# Supplementary material for: Comparison of Treatments for Frozen Shoulder: A Systematic Review and Meta-analysis
Source: PubMed Central journal article supplement (PMC7745103; doi:10.1001/jamanetworkopen.2020.29581), 2020-12-16
Supplement: jamanetwopen-e2029581-s001.pdf [file jamanetwopen-e2029581-s001.pdf]

## Supplemental Online Content

Challoumas D, Biddle M, McLean M, Millar NL. Comparison of treatments for frozen shoulder: a systematic review and meta-analysis. *JAMA Netw Open*. 2020;3(12):e2029581. doi:10.1001/jamanetworkopen.2020.29581

**eTable 1.** Explanation of the Components of the GRADE Tool and How They Were Assessed

**eTable 2.** Risk of Bias Assessments

**eTable 3.** Results of Comparisons of Interventions Assessed by Fewer Than 3 Studies and Were Not Pooled Qualitatively or Quantitatively

**eTable 4.** Results of Grading of the Certainty of Evidence According to the GRADE Tool for Each Comparison of Interventions

**eTable 5.** Results of Statistical Inconsistency Assessment for Each Pairwise Meta-analysis

**eFigure 1.** Results of Pairwise Meta-analyses with Respective Mean Differences for Early Short-term Outcomes

**eFigure 2.** Results of Pairwise Meta-analyses With Respective Mean Differences for Late Short-term Outcomes

**eFigure 3.** Results of Pairwise Meta-analyses With Respective Mean Differences for Mid-term Outcomes

**eFigure 4.** Results of Pairwise Meta-analyses With Respective Mean Differences for Function

**eFigure 5.** TSA Results for IA Corticosteroid vs No Treatment or Placebo for Early Short-term Pain

**eFigure 6.** TSA Results for IA Corticosteroid vs No Treatment or Placebo for Late Short-term Pain

**eFigure 7.** Network Forest Plots With Consistency Test for Late Short-term Pain

**eFigure 8.** Network Forest Plots With Consistency Test for Mid-term Pain

This supplemental material has been provided by the authors to give readers additional information about their work.

**eTable 1. Explanation of the Components of the GRADE Tool and How They Were Assessed.**

Grading of the certainty of evidence was performed separately for each outcome measure and for each follow up time period for each comparison of interventions. *ER ROM*, external rotation range of movement; *VAS*, visual analogue scale

| GRADE sub-component       | Method of assessment                                                                                                                                                                                                                                                                                                                                                                                                                                                                                                                                                                                                                             |
|---------------------------|--------------------------------------------------------------------------------------------------------------------------------------------------------------------------------------------------------------------------------------------------------------------------------------------------------------------------------------------------------------------------------------------------------------------------------------------------------------------------------------------------------------------------------------------------------------------------------------------------------------------------------------------------|
| Overall risk of bias      | Certainty of evidence was downgraded if the “high overall risk” studies contributed to more than 50% of the weight in the pairwise meta-analysis.                                                                                                                                                                                                                                                                                                                                                                                                                                                                                                |
| Imprecision of results    | Assessed with the optimal information size. This was tested by performing a conventional sample size calculation; if the total number of patients in the included comparisons was lower than that generated by the sample size calculation, the evidence was downgraded. A minimum of 59, 45 and 81 participants were required in each treatment group to detect a minimal clinically relevant difference (MRCD) of 1 point in VAS pain, 10 points in functional scales and 10 degrees in ER ROM respectively at a confidence of 95% (type I error) and power of 80% (type II error)                                                             |
| Inconsistency of evidence | Inconsistency was assessed with tests for heterogeneity (Tau <sup>2</sup> , Chi <sup>2</sup> and I <sup>2</sup> tests). Where the inconsistency index defined the heterogeneity as greater than 50% (substantial), sensitivity analyses were performed to identify and remove the studies that were responsible for the inconsistency where possible and the data were re-analysed. No more than one study from each comparison could be removed. Where not possible or in comparisons with 3 or less studies, the evidence was downgraded by one step. Where the I <sup>2</sup> statistic was greater than 75% the meta-analysis was abandoned. |
| Indirectness of evidence  | Assessed by the compared interventions, included populations and outcome measures. Where those were considered to be non-clinically relevant and where there was thought to be significant diversity in the included populations of the compared groups with regard to a) inclusion of patients with specific conditions (e.g. diabetics), b) duration of symptoms and c) home exercise the evidence was downgraded.                                                                                                                                                                                                                             |
| Other                     | Publication bias assessed by the construction of funnel plots where 10 or more studies were included in the same pairwise meta-analysis.                                                                                                                                                                                                                                                                                                                                                                                                                                                                                                         |

**eTable 2a. Risk of Bias Assessment for Patient-Reported Outcomes (pain, function).**

?, unclear risk

| First Author (year)       | Internal Validity<br>(Cochrane’s Collaboration Tool for Assessing Risk of Bias) |                        |                                |                              |                              |                     |       |              |
|---------------------------|---------------------------------------------------------------------------------|------------------------|--------------------------------|------------------------------|------------------------------|---------------------|-------|--------------|
|                           | Selection bias                                                                  |                        | Performance bias               | Detection bias               | Attrition bias               | Reporting bias      | Other | Overall Risk |
|                           | Random sequence generation                                                      | Allocation concealment | Blinding of patients and staff | Blinding of outcome measures | Completeness of outcome data | Selective reporting |       |              |
| Arslan et al. (2001)      | ?                                                                               | ?                      | High                           | High                         | Low                          | High                | High  | High         |
| Bal et al. (2008)         | Low                                                                             | ?                      | High                           | High                         | High                         | Low                 | Low   | <b>High</b>  |
| Binder et al. (1986)      | ?                                                                               | ?                      | High                           | High                         | Low                          | High                | Low   | <b>High</b>  |
| Blockey et al. (1954)     | ?                                                                               | ?                      | ?                              | ?                            | High                         | High                | High  | <b>High</b>  |
| Buchbinder et al. (2004a) | Low                                                                             | Low                    | Low                            | Low                          | Low                          | Low                 | High  | <b>Low</b>   |
| Buchbinder et al. (2004b) | Low                                                                             | Low                    | Low                            | Low                          | Low                          | Low                 | Low   | <b>Low</b>   |
| Bulgen at al. (1984)      | ?                                                                               | ?                      | High                           | High                         | Low                          | High                | Low   | <b>High</b>  |
| Calis et al. (2006)       | ?                                                                               | ?                      | High                           | High                         | Low                          | Low                 | Low   | <b>Low</b>   |
| Carette et al. (2003)     | Low                                                                             | Low                    | Low                            | Low                          | Low                          | Low                 | Low   | <b>Low</b>   |
| Cheing et al. (2008)      | ?                                                                               | High                   | High                           | High                         | Low                          | Low                 | High  | <b>High</b>  |
|                           | <b>Internal Validity</b>                                                        |                        |                                |                              |                              |                     |       |              |

| First Author (year)     | <b>(Cochrane's Collaboration Tool for Assessing Risk of Bias)</b> |                               |                                       |                                     |                                     |                            |              |                     |
|-------------------------|-------------------------------------------------------------------|-------------------------------|---------------------------------------|-------------------------------------|-------------------------------------|----------------------------|--------------|---------------------|
|                         | <i>Selection bias</i>                                             |                               | <i>Performance bias</i>               | <i>Detection bias</i>               | <i>Attrition bias</i>               | <i>Reporting bias</i>      | <i>Other</i> | <i>Overall Risk</i> |
|                         | <i>Random sequence generation</i>                                 | <i>Allocation concealment</i> | <i>Blinding of patients and staff</i> | <i>Blinding of outcome measures</i> | <i>Completeness of outcome data</i> | <i>Selective reporting</i> |              |                     |
| Chen et al. (2014)      | Low                                                               | Low                           | High                                  | High                                | Low                                 | ?                          | Low          | <b>Low</b>          |
| Cho et al. (2016)       | Low                                                               | ?                             | High                                  | High                                | High                                | low                        | Low          | <b>High</b>         |
| Dacre et al. (1989)     | ?                                                                 | ?                             | ?                                     | ?                                   | High                                | High                       | Low          | <b>Unclear</b>      |
| Dahan et al. (1999)     | Low                                                               | Low                           | Low                                   | Low                                 | Low                                 | Low                        | High         | <b>Low</b>          |
| De Carli et al. (2012)  | ?                                                                 | ?                             | High                                  | High                                | Low                                 | High                       | ?            | <b>High</b>         |
| Dehghan et al. (2013)   | Low                                                               | ?                             | High                                  | High                                | High                                | High                       | Low          | <b>High</b>         |
| Gallacher et al. (2018) | Low                                                               | High                          | High                                  | High                                | Low                                 | High                       | Low          | <b>High</b>         |
| Gam et al. (1998)       | Low                                                               | High                          | High                                  | High                                | Low                                 | Low                        | Low          | <b>High</b>         |
| Hsieh et al. (2012)     | Low                                                               | ?                             | High                                  | High                                | Low                                 | Low                        | High         | <b>High</b>         |
| Jacobs et al. (1991)    | ?                                                                 | ?                             | High                                  | High                                | High                                | Low                        | High         | <b>High</b>         |
| Jacobs et al. (2009)    | ?                                                                 | Low                           | High                                  | High                                | Low                                 | High                       | Low          | <b>High</b>         |

| First Author (year)           | Internal Validity<br>(Cochrane's Collaboration Tool for Assessing Risk of Bias) |                               |                                       |                                     |                                     |                            |              |                     |
|-------------------------------|---------------------------------------------------------------------------------|-------------------------------|---------------------------------------|-------------------------------------|-------------------------------------|----------------------------|--------------|---------------------|
|                               | <i>Selection bias</i>                                                           |                               | <i>Performance bias</i>               | <i>Detection bias</i>               | <i>Attrition bias</i>               | <i>Reporting bias</i>      | <i>Other</i> | <i>Overall Risk</i> |
|                               | <i>Random sequence generation</i>                                               | <i>Allocation concealment</i> | <i>Blinding of patients and staff</i> | <i>Blinding of outcome measures</i> | <i>Completeness of outcome data</i> | <i>Selective reporting</i> |              |                     |
| Jones & Chattopadhyay (1999)  | ?                                                                               | Low                           | High                                  | High                                | Low                                 | High                       | High         | <b>High</b>         |
| Khallaf et al. (2018)         | ?                                                                               | ?                             | High                                  | High                                | ?                                   | High                       | High         | <b>High</b>         |
| Khan et al. (2005)            | Low                                                                             | High                          | High                                  | High                                | High                                | ?                          | High         | <b>High</b>         |
| Kim et al. (2017)             | Low                                                                             | ?                             | ?                                     | ?                                   | High                                | Low                        | Low          | <b>Unclear</b>      |
| Kivimäki & Pohjolainen (2001) | ?                                                                               | ?                             | High                                  | ?                                   | High                                | High                       | High         | <b>High</b>         |
| Kivimäki et al. (2007)        | Low                                                                             | Low                           | High                                  | High                                | High                                | High                       | ?            | <b>High</b>         |
| Klc et al. (2015)             | Low                                                                             | Low                           | High                                  | High                                | Low                                 | Low                        | High         | <b>High</b>         |
| Koh et al. (2013)             | Low                                                                             | ?                             | High                                  | High                                | Low                                 | ?                          | Low          | <b>Low</b>          |
| Kraal et al. (2018)           | Low                                                                             | Low                           | ?                                     | ?                                   | High                                | Low                        | Low          | <b>Low</b>          |
| Lee et al. (1974)             | ?                                                                               | ?                             | High                                  | ?                                   | ?                                   | High                       | High         | <b>High</b>         |

| First Author (year)     | Internal Validity<br>(Cochrane's Collaboration Tool for Assessing Risk of Bias) |                               |                                       |                                     |                                     |                            |              |                     |
|-------------------------|---------------------------------------------------------------------------------|-------------------------------|---------------------------------------|-------------------------------------|-------------------------------------|----------------------------|--------------|---------------------|
|                         | <i>Selection bias</i>                                                           |                               | <i>Performance bias</i>               | <i>Detection bias</i>               | <i>Attrition bias</i>               | <i>Reporting bias</i>      | <i>Other</i> | <i>Overall Risk</i> |
|                         | <i>Random sequence generation</i>                                               | <i>Allocation concealment</i> | <i>Blinding of patients and staff</i> | <i>Blinding of outcome measures</i> | <i>Completeness of outcome data</i> | <i>Selective reporting</i> |              |                     |
| Lee et al. (2017a)      | Low                                                                             | ?                             | ?                                     | ?                                   | Low                                 | Low                        | Low          | <b>Unclear</b>      |
| Lee et al. (2017b)      | ?                                                                               | ?                             | High                                  | High                                | ?                                   | High                       | High         | <b>High</b>         |
| Lim et al. (2014)       | Low                                                                             | Low                           | ?                                     | ?                                   | ?                                   | High                       | Low          | <b>Unclear</b>      |
| Lo et al. (2020)        | ?                                                                               | High                          | ?                                     | High                                | ?                                   | ?                          | High         | <b>High</b>         |
| Lorbach et al. (2010)   | ?                                                                               | ?                             | High                                  | High                                | Low                                 | Low                        | Low          | <b>Low</b>          |
| Ma et al. (2006)        | ?                                                                               | ?                             | High                                  | High                                | Low                                 | ?                          | High         | <b>High</b>         |
| Maryam et al. (2012)    | ?                                                                               | ?                             | High                                  | High                                | High                                | High                       | High         | <b>High</b>         |
| Mukherjee et al. (2017) | Low                                                                             | ?                             | High                                  | High                                | Low                                 | Low                        | ?            | <b>Low</b>          |
| Mun & Baek (2016)       | Low                                                                             | Low                           | High                                  | High                                | Low                                 | Low                        | Low          | <b>Low</b>          |
| Oh et al. (2011)        | Low                                                                             | Low                           | ?                                     | ?                                   | Low                                 | High                       | Low          | <b>Low</b>          |
| Park & Hwnag (2000)     | High                                                                            | High                          | High                                  | High                                | Low                                 | Low                        | Low          | <b>High</b>         |

| First Author (year)         | Internal Validity<br>(Cochrane's Collaboration Tool for Assessing Risk of Bias) |                               |                                       |                                     |                                     |                            |              |                     |
|-----------------------------|---------------------------------------------------------------------------------|-------------------------------|---------------------------------------|-------------------------------------|-------------------------------------|----------------------------|--------------|---------------------|
|                             | <i>Selection bias</i>                                                           |                               | <i>Performance bias</i>               | <i>Detection bias</i>               | <i>Attrition bias</i>               | <i>Reporting bias</i>      | <i>Other</i> | <i>Overall Risk</i> |
|                             | <i>Random sequence generation</i>                                               | <i>Allocation concealment</i> | <i>Blinding of patients and staff</i> | <i>Blinding of outcome measures</i> | <i>Completeness of outcome data</i> | <i>Selective reporting</i> |              |                     |
| Park et al. (2013)          | Low                                                                             | ?                             | Low                                   | Low                                 | Low                                 | Low                        | Low          | <b>Low</b>          |
| Park et al. (2014)          | ?                                                                               | High                          | High                                  | High                                | ?                                   | Low                        | High         | <b>High</b>         |
| Park et al. (2015)          | ?                                                                               | ?                             | High                                  | High                                | ?                                   | High                       | High         | <b>High</b>         |
| Prestgaard et al. (2015)    | Low                                                                             | Low                           | High                                  | High                                | Low                                 | Low                        | Low          | <b>Low</b>          |
| Pushpasekaran et al. (2017) | ?                                                                               | ?                             | High                                  | High                                | ?                                   | High                       | Low          | <b>High</b>         |
| Quraishi et al. (2007)      | Low                                                                             | ?                             | High                                  | High                                | Low                                 | High                       | High         | <b>High</b>         |
| Ranalletta et al (2015)     | Low                                                                             | ?                             | High                                  | High                                | low                                 | low                        | Low          | <b>Low</b>          |
| Reza et al (2013)           | ?                                                                               | Low                           | Low                                   | Low                                 | Low                                 | Low                        | Low          | <b>Low</b>          |
| Rizk et al (1991)           | ?                                                                               | ?                             | High                                  | High                                | High                                | High                       | Low          | <b>High</b>         |
| Roh et al (2011)            | Low                                                                             | Low                           | High                                  | High                                | High                                | Low                        | Low          | <b>High</b>         |

| First Author (year)         | Internal Validity<br>(Cochrane's Collaboration Tool for Assessing Risk of Bias) |                               |                                       |                                     |                                     |                            |              |                     |
|-----------------------------|---------------------------------------------------------------------------------|-------------------------------|---------------------------------------|-------------------------------------|-------------------------------------|----------------------------|--------------|---------------------|
|                             | <i>Selection bias</i>                                                           |                               | <i>Performance bias</i>               | <i>Detection bias</i>               | <i>Attrition bias</i>               | <i>Reporting bias</i>      | <i>Other</i> | <i>Overall Risk</i> |
|                             | <i>Random sequence generation</i>                                               | <i>Allocation concealment</i> | <i>Blinding of patients and staff</i> | <i>Blinding of outcome measures</i> | <i>Completeness of outcome data</i> | <i>Selective reporting</i> |              |                     |
| Rouhani et al. (2016)       | Low                                                                             | ?                             | Low                                   | Low                                 | Low                                 | Low                        | Low          | <b>Low</b>          |
| Ryans et al. (2005)         | Low                                                                             | Low                           | High                                  | High                                | Low                                 | High                       | Low          | <b>High</b>         |
| Schroder et al. (2017)      | Low                                                                             | Low                           | Low                                   | Low                                 | Low                                 | Low                        | Low          | <b>Low</b>          |
| Schydrowsky et al (2012)    | ?                                                                               | Low                           | High                                  | High                                | High                                | High                       | High         | <b>High</b>         |
| Sharma et al. (2016)        | Low                                                                             | Low                           | Low                                   | Low                                 | Low                                 | Low                        | Low          | <b>Low</b>          |
| Shin & Lee (2013)           | Low                                                                             | Low                           | High                                  | High                                | High                                | Low                        | ?            | <b>High</b>         |
| Sun et al. (2001)           | ?                                                                               | ?                             | High                                  | High                                | Low                                 | Low                        | Low          | <b>Low</b>          |
| Sun et al. (2018)           | ?                                                                               | Low                           | ?                                     | Low                                 | Low                                 | High                       | Low          | <b>Low</b>          |
| Tveita et al. (2008)        | Low                                                                             | Low                           | High                                  | High                                | Low                                 | Low                        | ?            | <b>Low</b>          |
| Vahdatpour et al. (2014)    | Low                                                                             | ?                             | Low                                   | ?                                   | Low                                 | High                       | High         | <b>Low</b>          |
| van der Windt et al. (1997) | Low                                                                             | ?                             | High                                  | High                                | Low                                 | High                       | High         | <b>High</b>         |



| First Author (year)                  | Internal Validity<br>(Cochrane's Collaboration Tool for Assessing Risk of Bias) |                               |                                       |                                     |                                     |                            |              |                     |
|--------------------------------------|---------------------------------------------------------------------------------|-------------------------------|---------------------------------------|-------------------------------------|-------------------------------------|----------------------------|--------------|---------------------|
|                                      | <i>Selection bias</i>                                                           |                               | <i>Performance bias</i>               | <i>Detection bias</i>               | <i>Attrition bias</i>               | <i>Reporting bias</i>      | <i>Other</i> | <i>Overall Risk</i> |
|                                      | <i>Random sequence generation</i>                                               | <i>Allocation concealment</i> | <i>Blinding of patients and staff</i> | <i>Blinding of outcome measures</i> | <i>Completeness of outcome data</i> | <i>Selective reporting</i> |              |                     |
| Widiastuti-Samekto & Sianturi (2004) | Low                                                                             | ?                             | ?                                     | ?                                   | Low                                 | Low                        | High         | <b>Unclear</b>      |
| Yoon et al. (2016)                   | Low                                                                             | Low                           | Low                                   | Low                                 | Low                                 | Low                        | Low          | <b>Low</b>          |

**eTable 2b. Risk of Bias Assessment for Non–Patient-Reported Outcomes (External Rotation Range of Movement)**

| First Author (year)       | Internal Validity<br>(Cochrane’s Collaboration Tool for Assessing Risk of Bias) |                               |                                       |                                     |                                     |                            |              |                     |
|---------------------------|---------------------------------------------------------------------------------|-------------------------------|---------------------------------------|-------------------------------------|-------------------------------------|----------------------------|--------------|---------------------|
|                           | <i>Selection bias</i>                                                           |                               | <i>Performance bias</i>               | <i>Detection bias</i>               | <i>Attrition bias</i>               | <i>Reporting bias</i>      | <i>Other</i> | <i>Overall Risk</i> |
|                           | <i>Random sequence generation</i>                                               | <i>Allocation concealment</i> | <i>Blinding of patients and staff</i> | <i>Blinding of outcome measures</i> | <i>Completeness of outcome data</i> | <i>Selective reporting</i> |              |                     |
| Arslan et al. (2001)      | ?                                                                               | ?                             | High                                  | ?                                   | Low                                 | High                       | High         | <b>High</b>         |
| Bal et al. (2008)         | Low                                                                             | ?                             | High                                  | Low                                 | High                                | Low                        | Low          | <b>Low</b>          |
| Binder et al. (1986)      | ?                                                                               | ?                             | High                                  | Low                                 | Low                                 | High                       | Low          | <b>Low</b>          |
| Blockey et al. (1954)     | ?                                                                               | ?                             | ?                                     | Low                                 | High                                | High                       | High         | <b>High</b>         |
| Buchbinder et al. (2004a) | Low                                                                             | Low                           | Low                                   | Low                                 | Low                                 | Low                        | High         | <b>Low</b>          |
| Buchbinder et al. (2004b) | Low                                                                             | Low                           | Low                                   | Low                                 | Low                                 | Low                        | Low          | <b>Low</b>          |
| Bulgen at al. (1984)      | ?                                                                               | ?                             | High                                  | ?                                   | Low                                 | High                       | Low          | <b>Unclear</b>      |
| Calis et al. (2006)       | ?                                                                               | ?                             | High                                  | High                                | Low                                 | Low                        | Low          | <b>Low</b>          |
| Carette et al. (2003)     | Low                                                                             | Low                           | Low                                   | Low                                 | Low                                 | Low                        | Low          | <b>Low</b>          |
| Cheing et al. (2008)      | ?                                                                               | High                          | High                                  | High                                | Low                                 | Low                        | High         | <b>High</b>         |

| First Author (year)     | Internal Validity<br>(Cochrane's Collaboration Tool for Assessing Risk of Bias) |                               |                                       |                                     |                                     |                            |              |                     |
|-------------------------|---------------------------------------------------------------------------------|-------------------------------|---------------------------------------|-------------------------------------|-------------------------------------|----------------------------|--------------|---------------------|
|                         | <i>Selection bias</i>                                                           |                               | <i>Performance bias</i>               | <i>Detection bias</i>               | <i>Attrition bias</i>               | <i>Reporting bias</i>      | <i>Other</i> | <i>Overall Risk</i> |
|                         | <i>Random sequence generation</i>                                               | <i>Allocation concealment</i> | <i>Blinding of patients and staff</i> | <i>Blinding of outcome measures</i> | <i>Completeness of outcome data</i> | <i>Selective reporting</i> |              |                     |
| Chen et al. (2014)      | Low                                                                             | Low                           | High                                  | Low                                 | Low                                 | ?                          | Low          | <b>Low</b>          |
| Cho et al. (2016)       | Low                                                                             | ?                             | High                                  | low                                 | High                                | low                        | Low          | <b>Low</b>          |
| Dacre et al. (1989)     | ?                                                                               | ?                             | ?                                     | Low                                 | High                                | High                       | Low          | <b>Unclear</b>      |
| Dahan et al. (1999)     | Low                                                                             | Low                           | Low                                   | Low                                 | Low                                 | Low                        | High         | <b>Low</b>          |
| De Carli et al. (2012)  | ?                                                                               | ?                             | High                                  | ?                                   | Low                                 | High                       | ?            | <b>Unclear</b>      |
| Dehghan et al. (2013)   | Low                                                                             | ?                             | High                                  | ?                                   | High                                | High                       | Low          | <b>High</b>         |
| Gallacher et al. (2018) | Low                                                                             | High                          | High                                  | High                                | Low                                 | High                       | Low          | <b>High</b>         |
| Gam et al. (1998)       | Low                                                                             | High                          | High                                  | High                                | Low                                 | Low                        | Low          | <b>High</b>         |
| Hsieh et al. (2012)     | Low                                                                             | ?                             | High                                  | Low                                 | Low                                 | Low                        | High         | <b>Low</b>          |
| Jacobs et al. (1991)    | ?                                                                               | ?                             | High                                  | Low                                 | High                                | Low                        | High         | <b>High</b>         |
| Jacobs et al. (2009)    | ?                                                                               | Low                           | High                                  | ?                                   | Low                                 | High                       | Low          | <b>Low</b>          |

| First Author (year)           | Internal Validity<br>(Cochrane's Collaboration Tool for Assessing Risk of Bias) |                               |                                       |                                     |                                     |                            |              |                     |
|-------------------------------|---------------------------------------------------------------------------------|-------------------------------|---------------------------------------|-------------------------------------|-------------------------------------|----------------------------|--------------|---------------------|
|                               | <i>Selection bias</i>                                                           |                               | <i>Performance bias</i>               | <i>Detection bias</i>               | <i>Attrition bias</i>               | <i>Reporting bias</i>      | <i>Other</i> | <i>Overall Risk</i> |
|                               | <i>Random sequence generation</i>                                               | <i>Allocation concealment</i> | <i>Blinding of patients and staff</i> | <i>Blinding of outcome measures</i> | <i>Completeness of outcome data</i> | <i>Selective reporting</i> |              |                     |
| Jones & Chattopadhyay (1999)  | ?                                                                               | Low                           | High                                  | High                                | Low                                 | High                       | High         | <b>High</b>         |
| Khallaf et al. (2018)         | ?                                                                               | ?                             | High                                  | High                                | ?                                   | High                       | High         | <b>High</b>         |
| Khan et al. (2005)            | Low                                                                             | High                          | High                                  | High                                | High                                | ?                          | High         | <b>High</b>         |
| Kim et al. (2017)             | Low                                                                             | ?                             | ?                                     | ?                                   | High                                | Low                        | Low          | <b>Unclear</b>      |
| Kivimäki & Pohjolainen (2001) | ?                                                                               | ?                             | High                                  | ?                                   | High                                | High                       | High         | <b>High</b>         |
| Kivimäki et al. (2007)        | Low                                                                             | Low                           | High                                  | low                                 | High                                | High                       | ?            | <b>High</b>         |
| Klc et al. (2015)             | Low                                                                             | Low                           | High                                  | Low                                 | Low                                 | Low                        | High         | <b>Low</b>          |
| Koh et al. (2013)             | Low                                                                             | ?                             | High                                  | Low                                 | Low                                 | ?                          | Low          | <b>Low</b>          |
| Kraal et al. (2018)           | Low                                                                             | Low                           | ?                                     | ?                                   | High                                | Low                        | Low          | <b>Low</b>          |
| Lee et al. (1974)             | ?                                                                               | ?                             | High                                  | ?                                   | ?                                   | High                       | High         | <b>High</b>         |

| First Author (year)     | Internal Validity<br>(Cochrane's Collaboration Tool for Assessing Risk of Bias) |                               |                                       |                                     |                                     |                            |              |                     |
|-------------------------|---------------------------------------------------------------------------------|-------------------------------|---------------------------------------|-------------------------------------|-------------------------------------|----------------------------|--------------|---------------------|
|                         | <i>Selection bias</i>                                                           |                               | <i>Performance bias</i>               | <i>Detection bias</i>               | <i>Attrition bias</i>               | <i>Reporting bias</i>      | <i>Other</i> | <i>Overall Risk</i> |
|                         | <i>Random sequence generation</i>                                               | <i>Allocation concealment</i> | <i>Blinding of patients and staff</i> | <i>Blinding of outcome measures</i> | <i>Completeness of outcome data</i> | <i>Selective reporting</i> |              |                     |
| Lee et al. (2017a)      | Low                                                                             | ?                             | ?                                     | Low                                 | Low                                 | Low                        | Low          | <b>Low</b>          |
| Lee et al. (2017b)      | ?                                                                               | ?                             | High                                  | ?                                   | ?                                   | High                       | High         | <b>High</b>         |
| Lim et al. (2014)       | Low                                                                             | Low                           | ?                                     | Low                                 | ?                                   | High                       | Low          | <b>Low</b>          |
| Lo et al. (2020)        | ?                                                                               | High                          | ?                                     | High                                | ?                                   | ?                          | High         | <b>High</b>         |
| Lorbach et al. (2010)   | ?                                                                               | ?                             | High                                  | ?                                   | Low                                 | Low                        | Low          | <b>Unclear</b>      |
| Ma et al. (2006)        | ?                                                                               | ?                             | High                                  | ?                                   | Low                                 | ?                          | High         | <b>Unclear</b>      |
| Maryam et al. (2012)    | ?                                                                               | ?                             | High                                  | ?                                   | High                                | High                       | High         | <b>High</b>         |
| Mukherjee et al. (2017) | Low                                                                             | ?                             | High                                  | ?                                   | Low                                 | Low                        | ?            | <b>Unclear</b>      |
| Mun & Baek (2016)       | Low                                                                             | Low                           | High                                  | Low                                 | Low                                 | Low                        | Low          | <b>Low</b>          |
| Oh et al. (2011)        | Low                                                                             | Low                           | ?                                     | ?                                   | Low                                 | High                       | Low          | <b>Low</b>          |
| Park & Hwnag (2000)     | High                                                                            | High                          | High                                  | High                                | Low                                 | Low                        | Low          | <b>High</b>         |

| First Author (year)         | Internal Validity<br>(Cochrane's Collaboration Tool for Assessing Risk of Bias) |                               |                                       |                                     |                                     |                            |              |                     |
|-----------------------------|---------------------------------------------------------------------------------|-------------------------------|---------------------------------------|-------------------------------------|-------------------------------------|----------------------------|--------------|---------------------|
|                             | <i>Selection bias</i>                                                           |                               | <i>Performance bias</i>               | <i>Detection bias</i>               | <i>Attrition bias</i>               | <i>Reporting bias</i>      | <i>Other</i> | <i>Overall Risk</i> |
|                             | <i>Random sequence generation</i>                                               | <i>Allocation concealment</i> | <i>Blinding of patients and staff</i> | <i>Blinding of outcome measures</i> | <i>Completeness of outcome data</i> | <i>Selective reporting</i> |              |                     |
| Park et al. (2013)          | Low                                                                             | ?                             | Low                                   | Low                                 | Low                                 | Low                        | Low          | <b>Low</b>          |
| Park et al. (2014)          | ?                                                                               | High                          | High                                  | High                                | ?                                   | Low                        | High         | <b>High</b>         |
| Park et al. (2015)          | ?                                                                               | ?                             | High                                  | ?                                   | ?                                   | High                       | High         | <b>High</b>         |
| Prestgaard et al. (2015)    | Low                                                                             | Low                           | High                                  | Low                                 | Low                                 | Low                        | Low          | <b>Low</b>          |
| Pushpasekaran et al. (2017) | ?                                                                               | ?                             | High                                  | High                                | ?                                   | High                       | Low          | <b>High</b>         |
| Quraishi et al. (2007)      | Low                                                                             | ?                             | High                                  | Low                                 | Low                                 | High                       | High         | <b>High</b>         |
| Ranalletta et al (2015)     | Low                                                                             | ?                             | High                                  | low                                 | low                                 | low                        | Low          | <b>Low</b>          |
| Reza et al (2013)           | ?                                                                               | Low                           | Low                                   | Low                                 | Low                                 | Low                        | Low          | <b>Low</b>          |
| Rizk et al (1991)           | ?                                                                               | ?                             | High                                  | Low                                 | High                                | High                       | Low          | <b>High</b>         |
| Roh et al (2011)            | Low                                                                             | Low                           | High                                  | High                                | High                                | Low                        | Low          | <b>High</b>         |

| First Author (year)         | Internal Validity<br>(Cochrane's Collaboration Tool for Assessing Risk of Bias) |                               |                                       |                                     |                                     |                            |              |                     |
|-----------------------------|---------------------------------------------------------------------------------|-------------------------------|---------------------------------------|-------------------------------------|-------------------------------------|----------------------------|--------------|---------------------|
|                             | <i>Selection bias</i>                                                           |                               | <i>Performance bias</i>               | <i>Detection bias</i>               | <i>Attrition bias</i>               | <i>Reporting bias</i>      | <i>Other</i> | <i>Overall Risk</i> |
|                             | <i>Random sequence generation</i>                                               | <i>Allocation concealment</i> | <i>Blinding of patients and staff</i> | <i>Blinding of outcome measures</i> | <i>Completeness of outcome data</i> | <i>Selective reporting</i> |              |                     |
| Rouhani et al. (2016)       | Low                                                                             | ?                             | Low                                   | Low                                 | Low                                 | Low                        | Low          | <b>Low</b>          |
| Ryans et al. (2005)         | Low                                                                             | Low                           | High                                  | Low                                 | Low                                 | High                       | Low          | <b>Low</b>          |
| Schroder et al. (2017)      | Low                                                                             | Low                           | Low                                   | Low                                 | Low                                 | Low                        | Low          | <b>Low</b>          |
| Schydrowsky et al (2012)    | ?                                                                               | Low                           | High                                  | High                                | High                                | High                       | High         | <b>High</b>         |
| Sharma et al. (2016)        | Low                                                                             | Low                           | Low                                   | Low                                 | Low                                 | Low                        | Low          | <b>Low</b>          |
| Shin & Lee (2013)           | Low                                                                             | Low                           | High                                  | Low                                 | High                                | Low                        | ?            | <b>Low</b>          |
| Sun et al. (2001)           | ?                                                                               | ?                             | High                                  | Low                                 | Low                                 | Low                        | Low          | <b>Low</b>          |
| Sun et al. (2018)           | ?                                                                               | Low                           | ?                                     | Low                                 | Low                                 | High                       | Low          | <b>Low</b>          |
| Tveita et al. (2008)        | Low                                                                             | Low                           | High                                  | High                                | Low                                 | Low                        | ?            | <b>Low</b>          |
| Vahdatpour et al. (2014)    | Low                                                                             | ?                             | Low                                   | ?                                   | Low                                 | High                       | High         | <b>Low</b>          |
| van der Windt et al. (1998) | Low                                                                             | ?                             | High                                  | Low                                 | Low                                 | High                       | High         | <b>High</b>         |

| First Author (year)                  | Internal Validity<br>(Cochrane's Collaboration Tool for Assessing Risk of Bias) |                               |                                       |                                     |                                     |                            |              |                     |
|--------------------------------------|---------------------------------------------------------------------------------|-------------------------------|---------------------------------------|-------------------------------------|-------------------------------------|----------------------------|--------------|---------------------|
|                                      | <i>Selection bias</i>                                                           |                               | <i>Performance bias</i>               | <i>Detection bias</i>               | <i>Attrition bias</i>               | <i>Reporting bias</i>      | <i>Other</i> | <i>Overall Risk</i> |
|                                      | <i>Random sequence generation</i>                                               | <i>Allocation concealment</i> | <i>Blinding of patients and staff</i> | <i>Blinding of outcome measures</i> | <i>Completeness of outcome data</i> | <i>Selective reporting</i> |              |                     |
| Widiastuti-Samekto & Sianturi (2004) | Low                                                                             | ?                             | ?                                     | Low                                 | Low                                 | Low                        | High         | <b>Low</b>          |
| Yoon et al. (2016)                   | Low                                                                             | Low                           | Low                                   | Low                                 | Low                                 | Low                        | Low          | <b>Low</b>          |



**eTable 3. Results of Comparisons of Interventions Assessed by Fewer Than 3 Studies and Were Not Pooled Qualitatively or Quantitatively**

| Treatment modes                                                               | First author (year)              | Pain                       | Functional Disability (SPADI/DASH) | Function (Constant/HAQ/SST) | ROM ER                     | ROM ABD           | ROM FL                     | Satisfaction               |
|-------------------------------------------------------------------------------|----------------------------------|----------------------------|------------------------------------|-----------------------------|----------------------------|-------------------|----------------------------|----------------------------|
| Arthrographic distension + IA Corticosteroid vs placebo/no treatment          | <b>Buchbinder et al. (2004b)</b> | ↓ 3w<br>↔ 6w, 12w          | ↓ 3w<br>↔ 6w, 12w                  | -                           | ↔ 3w, 6w, 12w              | ↑ 3w<br>↔ 6w, 12w | ↔ 3w, 6w, 12w              | -                          |
|                                                                               | <b>Sharma et al. (2016)</b>      | ↓ 4w, 8w                   | ↑ 4w, 8w<br>↔ 12m                  | -                           | ↑ 4w, 8w                   | ↑ 4w, 8w          | -                          | -                          |
| Arthrographic distension + IA Corticosteroid vs Arthrographic distension      | <b>Jacobs et al. (1991)</b>      | -                          | -                                  | -                           | ↔ 4m                       | ↑ 4m              | ↑ 4m                       | -                          |
| Arthrographic distension vs IA Corticosteroid                                 | <b>Jacobs et al. (1991)</b>      | -                          | -                                  | -                           | ↔ 4m                       | ↓ 4m              | ↓ 4m                       | -                          |
| Arthrographic distension + IA Sodium Hyaluronate vs IA Corticosteroid         | <b>Park et al. (2013)</b>        | ↔ 2w, 6w                   | ↔ 2w, 6w                           | -                           | ↑ 2w, 6w                   | ↔ 2w, 6w          | ↔ 2w, 6w                   | -                          |
| Arthrographic distension + IA Corticosteroid + Physiotherapy vs Physiotherapy | <b>Khan et al. (2005)</b>        | ↔ 8w                       | -                                  | -                           | ↑ 8w                       | ↑ 8w              | -                          | -                          |
|                                                                               | <b>Park et al. (2014)</b>        | ↔ 4w                       | ↔ 4w                               | ↔ 4w                        | ↔ 4w                       | ↔ 4w              | ↔ 4w                       | -                          |
| Arthrographic distension + IA Corticosteroid vs SA Corticosteroid             | <b>Yoon et al. (2016)</b>        | ↑ 4w<br>↔ 12w, 6m          | -                                  | ↑ 4w, 12w<br>↔ 6m           | ↑ 4w<br>↔ 12w, 6m          | -                 | ↑ 4w<br>↔ 12w, 6m          | -                          |
| Arthrographic distension + MUA vs IA Corticosteroid                           | <b>Mun &amp; Baek (2016)</b>     | ↓ 2w, 6w, 12w<br>↔ 6m, 12m | -                                  | ↑ 2w, 6w, 12w<br>↔ 6m, 12m  | ↑ 2w, 6w<br>↔ 12w, 6m, 12m | -                 | ↑ 2w, 6w<br>↔ 12w, 6m, 12m | ↑ 2w, 6w, 12w<br>↔ 6m, 12m |

|                                                                                                              |                                |                   |                                           |                                    |                              |                              |                       |                     |
|--------------------------------------------------------------------------------------------------------------|--------------------------------|-------------------|-------------------------------------------|------------------------------------|------------------------------|------------------------------|-----------------------|---------------------|
| Arthrographic distension vs MUA + IA Corticosteroid                                                          | <b>Quraishi et al. (2007)</b>  | ↓ 8w, 6m          | -                                         | ↑ 8w, 6m                           | ↔ 8w, 6m                     | ↔ 8w, 6m                     | ↔ 8w, 6m              | -                   |
| Treatment modes                                                                                              | <b>First author (year)</b>     | <b>Pain</b>       | <b>Functional Disability (SPADI/DASH)</b> | <b>Function (Constant/HAQ/SST)</b> | <b>ROM ER</b>                | <b>ROM ABD</b>               | <b>ROM FL</b>         | <b>Satisfaction</b> |
| Arthrographic distension + IA Corticosteroid vs ACR + IA Corticosteroid                                      | <b>Gallacher et al. (2018)</b> | -                 | -                                         | ↔ 6w<br>↓ 12w, 6m                  | ↓ 6w, 12w, 6m                | ↔ 6m                         | ↓ 6m                  | ↔ 6w, 12w, 6m       |
| Arthrographic distension + IA Corticosteroid + Physiotherapy vs Arthrographic distension + IA Corticosteroid | <b>Park et al. (2014)</b>      | ↓ 4w              | ↓ 4w                                      | ↑ 4w                               | ↑ 4w                         | ↑ 4w                         | ↑ 4w                  | -                   |
| Arthrographic distension + IA Corticosteroid vs Physiotherapy                                                | <b>Park et al. (2014)</b>      | ↑ 4w              | ↔ 4w                                      | ↓ 4w                               | ↓ 4w                         | ↓ 4w                         | ↓ 4w                  | -                   |
| PO Corticosteroid vs ESWT                                                                                    | <b>Chen et al. (2014)</b>      | ↔ 2w, 4w, 6w, 12w | -                                         | ↔ 2w<br>↓ 4w, 6w, 12w              | ↔ 2w, 4w<br>↓ 6w, 12w        | ↔ 2w, 4w<br>↓ 6w, 12w        | ↔ 2w<br>↓ 4w, 6w, 12w | -                   |
| Rotator interval Corticosteroid vs SA Corticosteroid                                                         | <b>Sun et al. (2018)</b>       | ↓ 4w, 8w, 12w     | ↓ 4w, 8w, 12w                             | ↑ 4w, 8w, 12w                      | ↑ 4w, 8w, 12w                | ↑ 4w, 8w, 12w                | ↑ 4w, 8w, 12w         | -                   |
| Rotator interval Corticosteroid vs IA Corticosteroid                                                         | <b>Sun et al. (2018)</b>       | ↓ 4w, 8w, 12w     | ↓ 4w, 8w, 12w                             | ↑ 4w, 8w, 12w                      | ↑ 4w, 8w, 12w                | ↑ 4w, 8w, 12w                | ↑ 4w, 8w, 12w         | -                   |
| IA Corticosteroid + Physiotherapy vs Long Head of Biceps Corticosteroid + Physiotherapy                      | <b>Lee et al (1974)</b>        | -                 | -                                         | -                                  | ↔ 1w, 3w, 4w, 5w, 6w<br>↑ 2w | ↔ 1w, 3w, 4w, 5w, 6w<br>↑ 2w | -                     | -                   |

|                                                                 |                                |                          |                                           |                                    |                          |                          |                          |                          |
|-----------------------------------------------------------------|--------------------------------|--------------------------|-------------------------------------------|------------------------------------|--------------------------|--------------------------|--------------------------|--------------------------|
| IA + Rotator Interval Corticosteroid vs IA Corticosteroid       | <b>Prestgaard et al (2015)</b> | ↔ 3w, 6w, 12w, 6m        | ↔ 3w, 6w, 12w, 6m                         | -                                  | ↔ 3w, 6w, 12w, 6m        | ↔ 3w, 6w, 12w, 6m        | ↔ 3w, 6w, 12w, 6m        | ↔ 3w, 6w, 12w, 6m        |
| Treatment modes                                                 | <b>First author (year)</b>     | <b>Pain</b>              | <b>Functional Disability (SPADI/DASH)</b> | <b>Function (Constant/HAQ/SST)</b> | <b>ROM ER</b>            | <b>ROM ABD</b>           | <b>ROM FL</b>            | <b>Satisfaction</b>      |
| IA + Rotator Interval Corticosteroid vs no treatment            | <b>Prestgaard et al (2015)</b> | ↓ 6w, 12w<br>↔ 3w, 6m    | ↓ 3w, 6w, 12w<br>↔ 6m                     | -                                  | ↔ 3w, 6w, 12w, 6m        | ↑ 12w<br>↔ 3w, 6w, 6m    | ↑ 3w, 6w<br>↔ 12w, 6m    | ↑ 12w<br>↔ 3w, 6w, 6m    |
| Long Head of Biceps Corticosteroid + Physiotherapy vs Analgesia | <b>Lee et al (1974)</b>        | -                        | -                                         | -                                  | ↑ 1w, 2w, 3w, 4w, 5w, 6w | ↑ 1w, 2w, 3w, 4w, 5w, 6w | -                        | -                        |
| IA + SA Corticosteroid vs no treatment                          | <b>Shin &amp; Lee (2013)</b>   | ↓ 2w, 4w, 8w, 4m<br>↔ 6m | -                                         | ↑ 2w, 4w, 8w, 4m                   | ↑ 2w, 4w, 8w, 4m         | -                        | ↑ 2w, 4w, 8w, 4m<br>↔ 6m | ↑ 2w, 4w, 8w, 4m<br>↔ 6m |
| IA Corticosteroid vs IA + SA Corticosteroid                     | <b>Shin &amp; Lee (2013)</b>   | ↔ 2w, 4w, 8w, 4m, 6m     | -                                         | ↔ 2w, 4w, 8w, 4m, 6m               | ↔ 2w, 4w, 8w, 4m, 6m     | -                        | ↔ 2w, 4w, 8w, 4m, 6m     | ↔ 2w, 4w, 8w, 4m, 6m     |
|                                                                 | <b>Cho et al (2016)</b>        | ↔ 12w                    | -                                         | ↔ 12w                              | ↔ 12w                    | ↔ 12w                    | ↔ 12w                    | -                        |
| SA Corticosteroid vs IA + SA Corticosteroid                     | <b>Shin &amp; Lee (2013)</b>   | ↔ 2w, 4w, 8w, 4m, 6m     | -                                         | ↔ 2w, 4w, 8w, 4m, 6m               | ↔ 2w, 4w, 8w, 4m, 6m     | -                        | ↔ 2w, 4w, 8w, 4m, 6m     | ↔ 2w, 4w, 8w, 4m, 6m     |
|                                                                 | <b>Cho et al (2016)</b>        | ↓ 12w                    | -                                         | ↑ 12w                              | ↔ 12w                    | ↔ 12w                    | ↔ 12w                    | -                        |
| SA Corticosteroid vs no treatment                               | <b>Shin &amp; Lee (2013)</b>   | ↓ 2w, 4w, 8w, 4m<br>↔ 6m | -                                         | ↑ 2w, 4w, 8w, 4m<br>↔ 6m           | ↑ 2w, 4w, 8w, 4m<br>↔ 6m | -                        | ↑ 2w, 4w, 8w, 4m<br>↔ 6m | ↑ 2w, 4w, 8w, 4m<br>↔ 6m |
|                                                                 | <b>Rizk et al. (1991)</b>      | ↔ 1-11w, 4m, 6m          | -                                         | -                                  | -                        | -                        | -                        | -                        |

|                                                                        |                                                 |                                   |                                           |                                    |                                   |                                   |                                   |                     |
|------------------------------------------------------------------------|-------------------------------------------------|-----------------------------------|-------------------------------------------|------------------------------------|-----------------------------------|-----------------------------------|-----------------------------------|---------------------|
| IA Corticosteroid vs three-site Corticosteroid                         | <b>Pushpasekaran et al. (2017)</b>              | ↑ 3w, 6w<br>↔ 6m                  | -                                         | ↓ 3w, 6w, 6m                       | -                                 | -                                 | -                                 | -                   |
| Treatment modes                                                        | <b>First author (year)</b>                      | <b>Pain</b>                       | <b>Functional Disability (SPADI/DASH)</b> | <b>Function (Constant/HAQ/SST)</b> | <b>ROM ER</b>                     | <b>ROM ABD</b>                    | <b>ROM FL</b>                     | <b>Satisfaction</b> |
| IA Corticosteroid vs PO Corticosteroid                                 | <b>Lorbach et al (2010)</b>                     | ↔ 4w, 8w, 12w, 6m, 12m            | -                                         | ↑ 4w, 8w, 12w, 6m, 12m             | ↑ 4w, 8w<br>↔ 12w, 6m, 12m        | ↑ 8w, 6m, 12m<br>↔ 4w, 12w        | ↑ 4w, 8w, 12w<br>↔ 6m, 12m        | -                   |
| IA Corticosteroid + Physiotherapy vs PO Corticosteroid + Physiotherapy | <b>Widiastuti-Samekto &amp; Sianturi (2003)</b> | ↓ 1w<br>↔ 2w, 3w                  | -                                         | -                                  | -                                 | -                                 | -                                 | -                   |
| PO Corticosteroid vs Placebo/no treatment                              | <b>Blockey et al (1954)</b>                     | ↔ 4m                              | -                                         | -                                  | -                                 | NS                                | -                                 | -                   |
|                                                                        | <b>Buchbinder et al (2004a)</b>                 | ↓ 3w<br>↔ 6w<br>↑ 12w             | ↓ 3w<br>↔ 6w<br>↑ 12w                     | ↑ 3w<br>↔ 6w<br>↓ 12w              | ↔ 3w, 6w, 12w                     | ↑ 3w<br>↔ 6w<br>↓ 12w             | ↑ 3w<br>↔ 6w<br>↓ 12w             | ↔ 3w, 6w, 12w       |
|                                                                        | <b>Binder et al. (1986)</b>                     | ↔ 2w, 4w, 6w, 12w, 5m, 6m, 7m, 8m | -                                         | -                                  | ↔ 2w, 4w, 6w, 12w, 5m, 6m, 7m, 8m | ↔ 2w, 4w, 6w, 12w, 5m, 6m, 7m, 8m | ↔ 2w, 4w, 6w, 12w, 5m, 6m, 7m, 8m | -                   |
| IA Sodium hyaluronate vs Physiotherapy                                 | <b>Calis et al (2006)</b>                       | ↔ 2w, 12w                         | -                                         | ↓ 2w<br>↔ 12w                      | ↓ 2w, 12w                         | ↓ 2w<br>↔ 12w                     | -                                 | -                   |
| IA Sodium hyaluronate vs IA Corticosteroid                             | <b>Calis et al (2006)</b>                       | ↔ 2w, 12w                         | -                                         | ↔ 2w, 12w                          | ↔ 2w, 12w                         | ↔ 2w, 12w                         | -                                 | -                   |
| IA Sodium hyaluronate vs no treatment                                  | <b>Calis et al (2006)</b>                       | ↔ 2w, 12w                         | -                                         | ↔ 2w<br>↑ 12w                      | ↔ 2w, 12w                         | ↔ 2w, 12w                         | -                                 | -                   |

|                                                                             |                                         |                          |                                           |                                    |                       |                       |                       |                     |
|-----------------------------------------------------------------------------|-----------------------------------------|--------------------------|-------------------------------------------|------------------------------------|-----------------------|-----------------------|-----------------------|---------------------|
| IA Sodium hyaluronate + IA Tramadol vs IA Sodium Hyaluronate                | <b>Kim et al. (2017)</b>                | ↓ 1w, 2w<br>↔ 3w, 4w, 6w | ↔ 1w, 2w, 3w, 4w, 6w                      | ↔ 1w, 2w, 3w, 4w, 6w               | ↔ 1w, 2w, 3w, 4w, 6w  | ↔ 1w, 2w, 3w, 4w, 6w  | -                     | -                   |
| Treatment modes                                                             | <b>First author (year)</b>              | <b>Pain</b>              | <b>Functional Disability (SPADI/DASH)</b> | <b>Function (Constant/HAQ/SST)</b> | <b>ROM ER</b>         | <b>ROM ABD</b>        | <b>ROM FL</b>         | <b>Satisfaction</b> |
| IA Sodium Hyaluronate + Physiotherapy vs Physiotherapy                      | <b>Hsieh et al. (2012)</b>              | ↔ 6w, 12w                | ↔ 6w, 12w                                 | -                                  | ↔ 6w, 12w             | ↔ 6w, 12w             | ↔ 6w, 12w             | ↔ 6w, 12w           |
| IA Corticosteroid vs IA Sodium Hyaluronate                                  | <b>Lim et al (2014)</b>                 | ↔ 2w, 12w                | -                                         | ↔ 2w, 12w                          | ↔ 12w                 | -                     | ↔ 12w                 | -                   |
| IA Corticosteroid vs Adilubimab                                             | <b>Schydrowsky et al (2012)</b>         | -                        | ↔ 2w, 4w, 8w, 12w, 6m                     | ↔ 2w, 4w, 8w, 12w, 6m              | ↔ 2w, 4w, 8w, 12w, 6m | ↔ 2w, 4w, 8w, 12w, 6m | ↔ 2w, 4w, 8w, 12w, 6m | -                   |
| Suprascapular nerve block vs Placebo                                        | <b>Dahan et al. (1999)</b>              | ↔ 4w                     | ↔ 4w                                      |                                    | ↔ 4w                  | ↔ 4w                  | ↔ 4w                  | -                   |
| Suprascapular nerve block vs IA Corticosteroid                              | <b>Jones &amp; Chattopadhyay (1999)</b> | ↓ 12w                    | -                                         | -                                  | ↑ 12w                 | ↑ 12w                 | -                     | -                   |
| Suprascapular nerve block + Physiotherapy vs Physiotherapy (+/- placebo)    | <b>Dahan et al. (2000)</b>              | ↓ 4w                     | -                                         | ↔ 4w                               | ↔ 4w                  | ↔ 4w                  | ↔ 4w                  | -                   |
|                                                                             | <b>Klc et al. (2015)</b>                | ↓ 3w, 7w                 | -                                         | ↑ 3w<br>↔ 7w                       | -                     | -                     | -                     | -                   |
| Intranasal calcitonin + Physiotherapy vs intranasal Placebo + Physiotherapy | <b>Rouhani et al. (2016)</b>            | ↓ 6w                     | ↑ 6w                                      |                                    | ↑ 6w                  | ↑ 6w                  | ↑ 6w                  | ↑ 6w                |
| MUA + ACR vs IA Corticosteroid + Physiotherapy                              | <b>De Carli et al. (2012)</b>           | -                        | -                                         | ↔ 6w, 12m                          | ↔ 6w, 12m             | ↔ 6w, 12m             | ↔ 6w, 12m             | -                   |

|                                                     |                               |                           |                                    |                             |                       |                       |                       |                   |
|-----------------------------------------------------|-------------------------------|---------------------------|------------------------------------|-----------------------------|-----------------------|-----------------------|-----------------------|-------------------|
| MUA vs IA Corticosteroid + Arthrographic distension | Jacobs et al. (2009)          | ↔ 2w, 6w, 12w, 4m         | -                                  | ↔ 2w, 6w, 12w, 4m           | -                     | -                     | -                     | ↔ 2w, 6w, 12w, 4m |
| Treatment modes                                     | First author (year)           | Pain                      | Functional Disability (SPADI/DASH) | Function (Constant/HAQ/SST) | ROM ER                | ROM ABD               | ROM FL                | Satisfaction      |
| MUA + IA Corticosteroid vs MUA                      | Kivimäki & Pohjolainen (2001) | -                         | -                                  | -                           | ↔ 4m                  | ↔ 4m                  | ↔ 4m                  | -                 |
| MUA vs no treatment                                 | Kivimäki et al. (2007)        | ↔ 6w, 12w, 6m, 12m        | ↔ 6w, 12w, 6m, 12m                 | ↔ 6w, 12w, 6m, 12m          | ↔ 6w, 12w, 6m, 12m    | ↔ 6w, 12w, 6m, 12m    | ↔ 6w 6m, 12m<br>↑ 12w | -                 |
| ACR vs IA Corticosteroid                            | Mukherjee et al. (2017)       | ↔ 4w<br>↓ 8w, 12w, 4m, 5m | -                                  | ↑ 4w, 8w, 12w, 4m, 5m       | ↑ 4w, 8w, 12w, 4m, 5m | ↑ 4w, 8w, 12w, 4m, 5m | ↑ 4w, 8w, 12w, 4m, 5m | -                 |
| Acupuncture + Physiotherapy vs Acupuncture          | Ma et al. (2006)              | ↓ 4w                      | -                                  | -                           | ↔ 4w                  | ↔ 4w                  | ↔ 4w                  | -                 |
| Acupuncture vs physiotherapy                        | Cheing et al. (2008)          | ↔ 4w, 12w, 6m             | -                                  | ↔ 4w, 12w, 6m               | -                     | -                     | -                     | -                 |
|                                                     | Ma et al. (2006)              | ↓ 4w                      | -                                  | -                           | ↔ 4w                  | ↔ 4w                  | ↔ 4w                  | -                 |
| Acupuncture vs sham acupuncture/no treatment        | Cheing et al. (2008)          | ↓ 4w                      | -                                  | ↑ 4w                        | -                     | -                     | -                     | -                 |
|                                                     | Schroder et al. (2017)        | ↓(post session)           | -                                  | ↔ (post session)            | -                     | -                     | -                     | -                 |
|                                                     | Sun et al. (2001)             | -                         | -                                  | ↑ 6w, 5m                    | -                     | -                     | -                     | -                 |

ACR, arthroscopic capsular release; ESWT, extracorporeal shock wave therapy; IA, intra-articular; m, months; MUA, manipulation under anaesthesia; PO, per oral; SA, subacromial; w; weeks

**eTable 4. Results of Grading of the Certainty of Evidence According to the GRADE Tool for Each Comparison of Interventions**

| Comparison                                                             | Outcome measure       | Number of studies | Overall risk of bias | Inconsistency | Indirectness | Imprecision | Other                              | Strength of Evidence |
|------------------------------------------------------------------------|-----------------------|-------------------|----------------------|---------------|--------------|-------------|------------------------------------|----------------------|
| Arthrographic distension + IA Corticosteroid vs IA Corticosteroid only | Pain                  | 4 EST             | Low                  | Low           | Low          | Low         | Low                                | High EST             |
|                                                                        |                       | 5 LST             |                      |               |              |             |                                    | High LST             |
|                                                                        | Functional Disability | 3 EST             | Low                  | High EST      | Low          | Low         | Low                                | Mod EST              |
| 4 LST                                                                  |                       | Low LST           |                      | High LST      |              |             |                                    |                      |
| ROM ER                                                                 | 3 EST                 | Low               | Low                  | Low           | Low          | Low         | Low                                | High EST             |
|                                                                        | 5 LST                 |                   |                      |               |              |             |                                    | High LST             |
| Physiotherapy vs no treatment/placebo                                  | ROM ER                | 4 EST             | Low                  | Low           | Low          | High        | Low                                | Mod EST              |
| IA Corticosteroid vs IA Placebo/No treatment                           | Pain                  | 11 EST            | Low EST              | Low EST       | Low          | Low         | Low (Funnel plots for EST and LST) | High EST             |
|                                                                        |                       | 10 LST            | Low LST              | High LST      |              |             |                                    | Mod LST              |
|                                                                        |                       | 7 MT              | High MT              | Low MT        |              |             |                                    | Mod MT               |
| Functional Disability                                                  | 9 EST                 | Low EST           | High EST             | Low           | Low          |             | Mod EST                            |                      |
|                                                                        | 8 LST                 | Low LST           | High LST             |               |              |             | Mod LST                            |                      |
|                                                                        | 5 MT                  | High MT           | Low MT               |               |              |             | Mod MT                             |                      |

|                                                                     | ROM ER                       | 11 EST            | Low EST              | Low           | Low          | Low         | Low                            | High EST             |          |
|---------------------------------------------------------------------|------------------------------|-------------------|----------------------|---------------|--------------|-------------|--------------------------------|----------------------|----------|
| Comparison                                                          | Outcome measure              | Number of studies | Overall risk of bias | Inconsistency | Indirectness | Imprecision | Other                          | Strength of Evidence |          |
|                                                                     |                              | 11 LST<br>7 MT    | Low LST<br>High MT   |               |              |             | (Funnel plots for EST and LST) | High LST<br>Mod MT   |          |
| <b>IA Corticosteroid + Physiotherapy vs IA Placebo/no treatment</b> | <b>ER ROM</b>                | 3 EST             | Low                  | Low           | Low          | Low         | Low                            | High EST             |          |
| <b>IA Corticosteroid vs Physiotherapy</b>                           | <b>Pain</b>                  | 7 EST             | High EST             | Low EST       |              |             |                                | MOD EST              |          |
|                                                                     |                              | 4 LST             | Low LST              | Low LST       | Low          | Low         | Low                            | High LST             |          |
|                                                                     |                              | 5 MT              | High MT              | High MT       |              |             |                                | LOW MT               |          |
|                                                                     | <b>Functional Disability</b> | 5 EST             | High EST             | Low EST       |              |             |                                |                      | MOD EST  |
|                                                                     |                              | 3 LST             | Low LST              | High LST      | Low          | Low         | Low                            | Low                  | MOD LST  |
|                                                                     |                              | 4 MT              | High MT              | Low MT        |              |             |                                |                      | MOD MT   |
|                                                                     | <b>ROM ER</b>                | 6 EST             | Low EST              | High EST      |              |             |                                |                      | MOD EST  |
|                                                                     |                              | 4 LST             | Low LST              | Low LST       | Low          | Low         | Low                            | Low                  | HIGH LST |
|                                                                     |                              | 4 MT              | High MT              | Low MT        |              |             |                                |                      | MOD MT   |



| Comparison                                                  | Outcome measure       | Number of studies | Overall risk of bias | Inconsistency       | Indirectness | Imprecision        | Other | Strength of Evidence |
|-------------------------------------------------------------|-----------------------|-------------------|----------------------|---------------------|--------------|--------------------|-------|----------------------|
| IA Corticosteroid + Physiotherapy vs IA Corticosteroid only | Pain                  | 4 EST<br>5 MT     | High                 | Low                 | Low          | Low                | Low   | MOD EST<br>MOD MT    |
|                                                             | Functional Disability | 4 EST<br>4 MT     | High EST<br>Low MT   | Low                 | Low          | High EST<br>Low MT | Low   | LOW EST<br>HIGH MT   |
|                                                             | ROM ER                | 4 EST<br>4 MT     | Low                  | High EST<br>Low MT  | Low          | Low                | Low   | MOD EST<br>HIGH MT   |
| IA Corticosteroid + Physiotherapy vs Physiotherapy only     | Pain                  | 4 EST<br>4 MT     | High                 | Low                 | Low          |                    | Low   | MOD EST<br>MOD MT    |
|                                                             | Functional Disability | 3 EST<br>3 MT     | High                 | Low                 | Low          | High               | Low   | LOW EST<br>LOW MT    |
|                                                             | ROM ER                | 4 EST<br>3 MT     | High EST<br>Low MT   | Low                 | Low          | Low                | Low   | MOD EST<br>HIGH MT   |
| IA Corticosteroid vs SA Corticosteroid                      | Pain                  | 6 EST<br>7 LST    | Low EST<br>High LST  | High EST<br>Low LST | Low          | Low                | Low   | MOD EST<br>MOD LST   |

|                                                                 |                 | 3 MT              | Low MT               | High MT       |              |             |       | MOD MT                  |
|-----------------------------------------------------------------|-----------------|-------------------|----------------------|---------------|--------------|-------------|-------|-------------------------|
| Comparison                                                      | Outcome measure | Number of studies | Overall risk of bias | Inconsistency | Indirectness | Imprecision | Other | Strength of Evidence    |
| IA Corticosteroid vs SA Corticosteroid                          | Function        | 5 EST             | Low                  | Low           | Low          | Low         | Low   | HIGH EST                |
|                                                                 |                 | 6 LST             |                      |               |              |             |       | HIGH LST                |
| Acupuncture + Physiotherapy vs Physiotherapy only (+/- placebo) | Pain            | 3 EST             | High                 | Low           | Low          | High        | Low   | LOW EST                 |
|                                                                 |                 | 3 EST             |                      |               |              |             |       | HIGH EST                |
| ESWT + Physiotherapy vs Physiotherapy only (+/- sham ESWT)      | Pain            | 3 EST             | High                 | Too high      | Low          | High        | Low   | Meta-analysis abandoned |
|                                                                 |                 |                   |                      |               |              |             |       |                         |

Each outcome measure and each follow up time period graded separately

ER ROM, external rotation range of movement; EST, early short-term (2-6 weeks); ESWT, extracorporeal shock wave therapy; IA, intra-articular; LST, late short-term (8-12 weeks); MT, mid-term (4-6 months); SA, subacromial.

**eTable 5. Results of Statistical Inconsistency Assessment for Each Pairwise Meta-analysis**

| Comparison                                                | Outcome Measure | Follow up time period | I <sup>2</sup> | Study removed after sensitivity analysis | I <sup>2</sup> |
|-----------------------------------------------------------|-----------------|-----------------------|----------------|------------------------------------------|----------------|
| IA Corticosteroid vs No Treatment/Placebo                 | Pain            | Early short-term      | 46%            | -                                        | -              |
|                                                           |                 | Late short-term       | 80%            | Rizk et al. (1991)                       | 72%            |
|                                                           |                 | Mid-term              | 72%            | Prestgaard et al. (2015)                 | 48%            |
|                                                           | Function        | Early short-term      | 83%            | Ranalletta et al (2015)                  | 64%            |
|                                                           |                 | Late short-term       | 81%            | Ranalletta et al (2015)                  | 52%            |
|                                                           |                 | Mid-term              | 0%             | -                                        | -              |
|                                                           | ER ROM          | Early short-term      | 20%            | -                                        | -              |
|                                                           |                 | Late short-term       | 53%            | Ranalletta et al (2015)                  | 48%            |
|                                                           |                 | Mid-term              | 31%            | -                                        | -              |
| Physiotherapy vs No Treatment/Placebo                     | ER ROM          | Early short-term      | 95%            | Carette et al. (2003)                    | 47%            |
| IA Corticosteroid + Physiotherapy vs No Treatment/Placebo | ER ROM          | Early short-term      | 0%             | -                                        | -              |
| IA Corticosteroid vs Physiotherapy                        | Pain            | Early short-term      | 56%            | Van der Windt et al. (1998)              | 23%            |
|                                                           |                 | Late short-term       | 22%            | -                                        | -              |
|                                                           |                 | Mid-term              | 66%            | -                                        | -              |

|                                                        | Function        | Early short-term      | 66%            | Calis et al. (2006)                      | 0%             |
|--------------------------------------------------------|-----------------|-----------------------|----------------|------------------------------------------|----------------|
| Comparison                                             | Outcome Measure | Follow up time period | I <sup>2</sup> | Study removed after sensitivity analysis | I <sup>2</sup> |
| IA Corticosteroid vs Physiotherapy                     | Function        | Late short-term       | 65%            | -                                        | -              |
|                                                        |                 | Mid-term              | 17%            | -                                        | -              |
|                                                        | ER ROM          | Early short-term      | 73%            | -                                        | -              |
|                                                        |                 | Late short-term       | 61%            | Bulgen et al. (1984)                     | 0%             |
|                                                        |                 | Mid-term              | 0%             | -                                        | -              |
| IA Corticosteroid + Physiotherapy vs IA Corticosteroid | Pain            | Early short-term      | 77%            | Kraal et al. (2018)                      | 0%             |
|                                                        |                 | Mid-term              | 1%             | -                                        | -              |
|                                                        | Function        | Early short-term      | 77%            | Kraal et al. (2018)                      | 0%             |
|                                                        |                 | Mid-term              | 0%             | -                                        | -              |
|                                                        | ER ROM          | Early short-term      | 87%            | Maryam et al. (2012)                     | 52%            |
|                                                        |                 | Mid-term              | 45%            | -                                        | -              |
| IA Corticosteroid + Physiotherapy vs Physiotherapy     | Pain            | Early short-term      | 76%            | Carette et al. (2003)                    | 0%             |
|                                                        |                 | Mid-term              | 23%            | -                                        | -              |
|                                                        | Function        | Early short-term      | 7%             | -                                        | -              |

|                                                                   |                 | Mid-term              | 2%             | -                                        | -              |
|-------------------------------------------------------------------|-----------------|-----------------------|----------------|------------------------------------------|----------------|
| Comparison                                                        | Outcome Measure | Follow up time period | I <sup>2</sup> | Study removed after sensitivity analysis | I <sup>2</sup> |
| IA Corticosteroid + Physiotherapy vs Physiotherapy                | ER ROM          | Early short-term      | 53%            | Carette et al. (2003)                    | 0%             |
|                                                                   |                 | Mid-term              | 92%            | -                                        | -              |
| IA Corticosteroid vs SA Corticosteroid                            | Pain            | Early short-term      | 95%            | Cho et al. (2016)                        | 60%            |
|                                                                   |                 | Late short-term       | 52%            | Cho et al. (2016)                        | 22%            |
|                                                                   |                 | Mid-term              | 78%            | -                                        | -              |
|                                                                   | Function        | Early short-term      | 70%            | Cho et al. (2016)                        | 0%             |
|                                                                   |                 | Late short-term       | 57%            | Cho et al. (2016)                        | 43%            |
|                                                                   | ER ROM          | Early short-term      | 42%            | -                                        | -              |
|                                                                   |                 | Late short-term       | 67%            | Sun et al. (2018)                        | 43%            |
| Mid-term                                                          |                 | 28%                   | -              | -                                        |                |
| Arthrographic Distension + IA Corticosteroid vs IA Corticosteroid | Pain            | Early short-term      | 0%             | -                                        | -              |
|                                                                   |                 | Late short-term       | 51%            | Gam et al. (1998)                        | 0%             |
|                                                                   | Function        | Early short-term      | 61%            | -                                        | -              |
|                                                                   |                 | Late short-term       | 0%             | -                                        | -              |

|                                                                   | ER ROM          | Early short-term      | 18%            | -                                        | -              |
|-------------------------------------------------------------------|-----------------|-----------------------|----------------|------------------------------------------|----------------|
| Comparison                                                        | Outcome Measure | Follow up time period | I <sup>2</sup> | Study removed after sensitivity analysis | I <sup>2</sup> |
| Arthrographic Distension + IA Corticosteroid vs IA Corticosteroid | ER ROM          | Late short-term       | 85%            | Reza et al. (2015)                       | 0%             |
| Acupuncture + Physiotherapy vs Physiotherapy                      | Pain            | Early short-term      | 0%             | -                                        | -              |
|                                                                   | ER ROM          | Early short-term      | 0%             | -                                        | -              |
| ESWT + Physiotherapy vs Physiotherapy only (+/- sham ESWT)        | Pain            | Early short-term      | 93%*           | -                                        | -              |

Where the I<sup>2</sup> statistic was greater than 50% and there were at least four studies in the meta-analysis, sensitivity analyses were conducted to identify and remove a single study which was responsible for the high heterogeneity and the test was re-performed. *ER ROM, external rotation range of movement*

\*Sensitivity analysis not performed as only three studies in meta-analysis

eFigure 1. Results of Pairwise Meta-analyses with Respective Mean Differences for Early Short-term Outcomes

### Early short-term results (2-6 weeks)

#### a) IA Corticosteroid vs No Treatment/Placebo

##### Pain

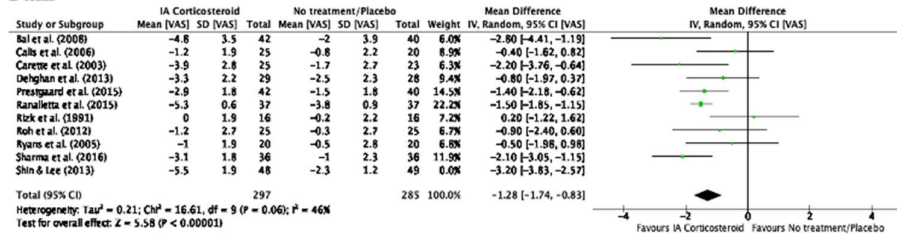

##### ER ROM

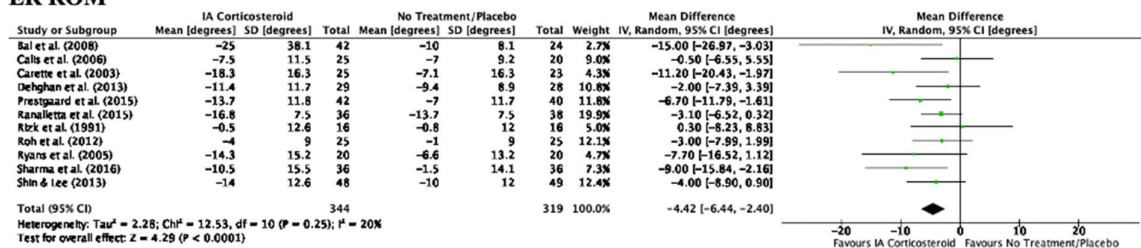

#### b) Physiotherapy vs No Treatment/Placebo

##### ER ROM

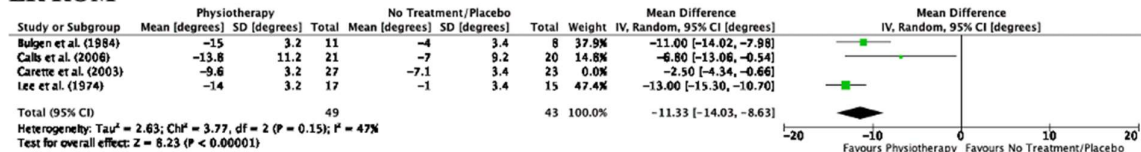

#### c) IA Corticosteroid + Physiotherapy vs No Treatment/Placebo

##### ER ROM

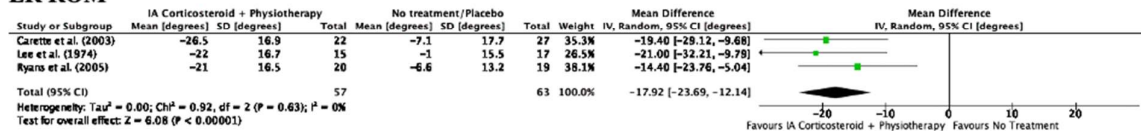

#### d) IA Corticosteroid vs Physiotherapy

##### Pain

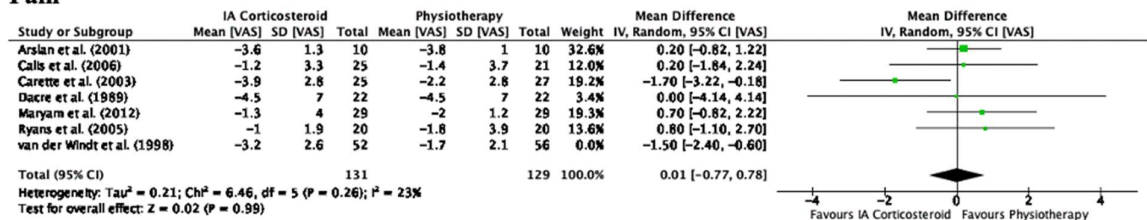

## ER ROM

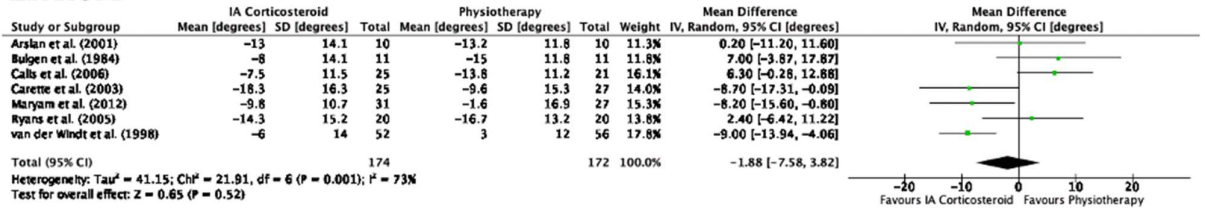

### e) IA Corticosteroid + Physiotherapy vs IA Corticosteroid only

#### Pain

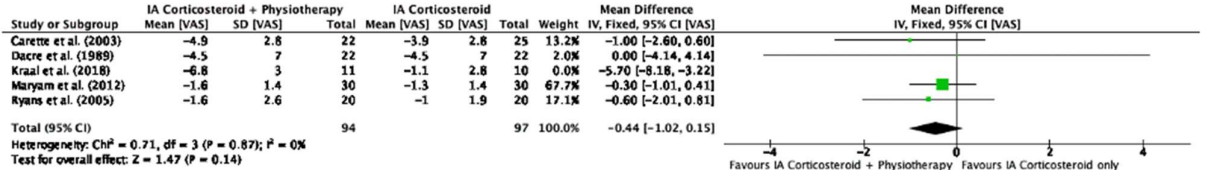

#### ER ROM

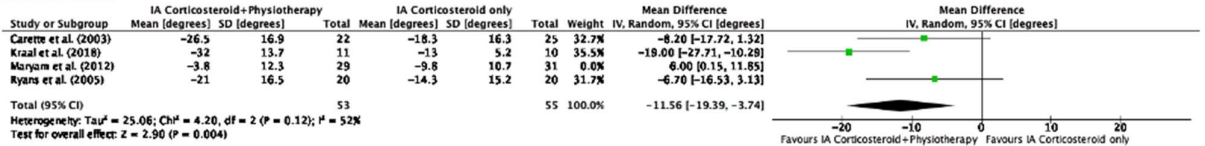

### f) IA Corticosteroid + Physiotherapy vs Physiotherapy only

#### Pain

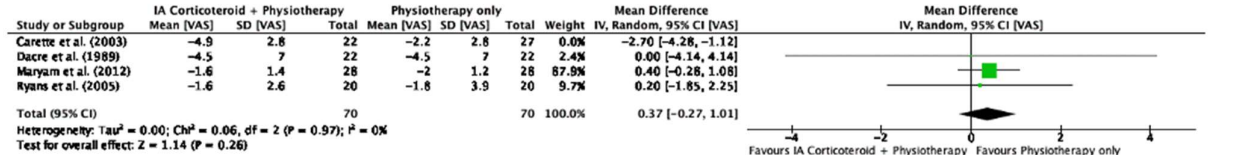

#### ER ROM

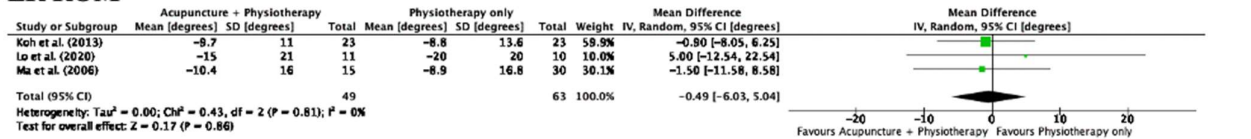

### g) IA Corticosteroid vs SA Corticosteroid

#### Pain

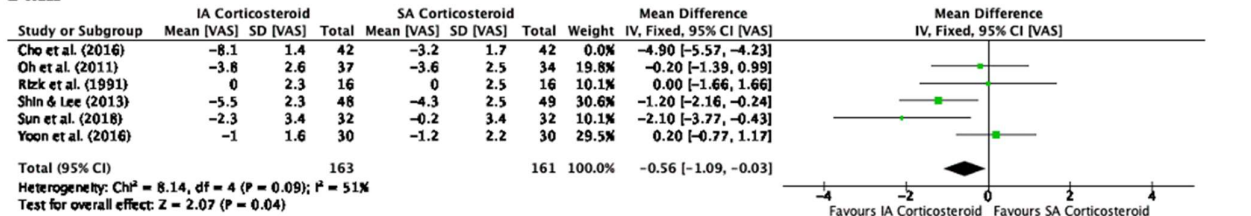



## ER ROM

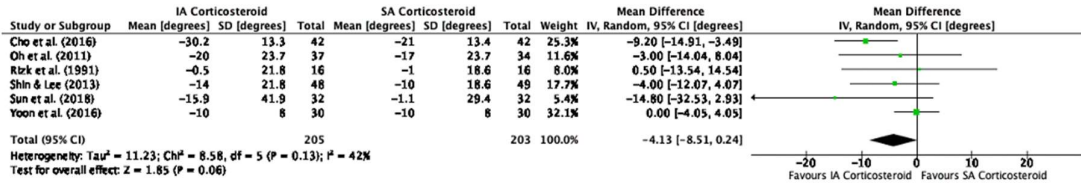

## h) IA Corticosteroid + Arthrographic Distension vs IA Corticosteroid only

### Pain

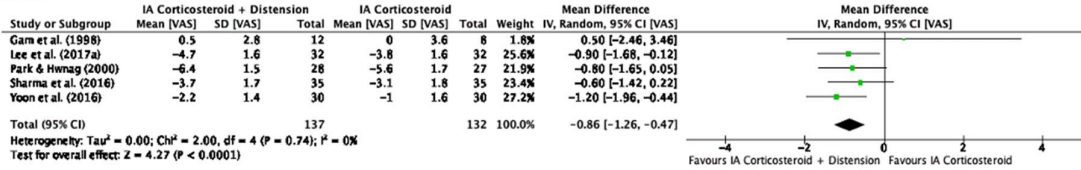

## ER ROM

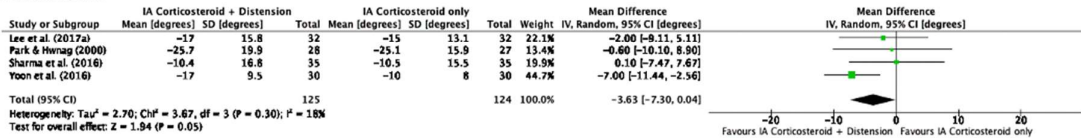

## i) Acupuncture + Physiotherapy vs Physiotherapy only (+/- sham acupuncture)

### Pain

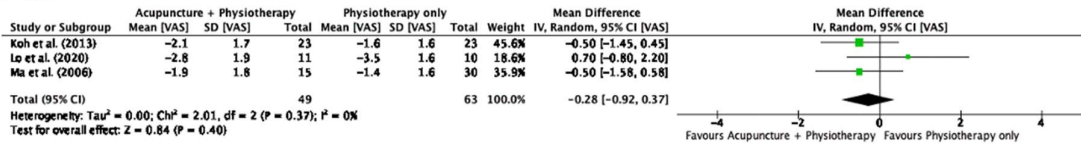

## ER ROM

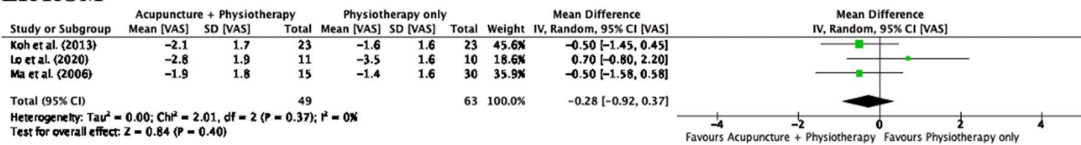

eFigure 2. Results of Pairwise Meta-analyses With Respective Mean Differences for Late Short-term Outcomes

### Late short-term results (8-12 weeks)

#### a) IA Corticosteroid vs No Treatment/Placebo

##### Pain

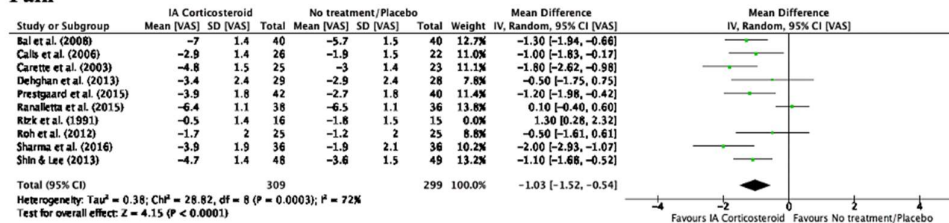

##### ER ROM

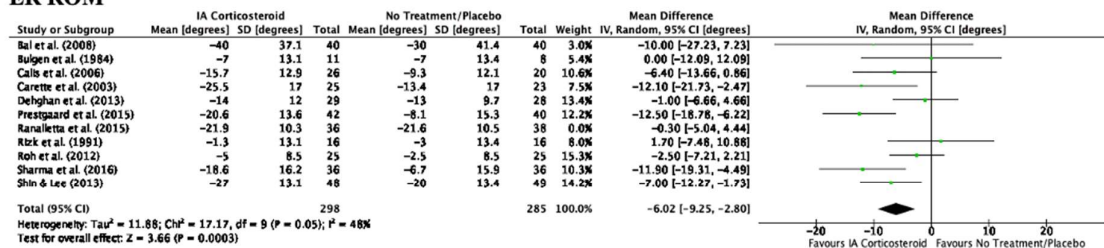

#### b) IA Corticosteroid vs Physiotherapy

##### Pain

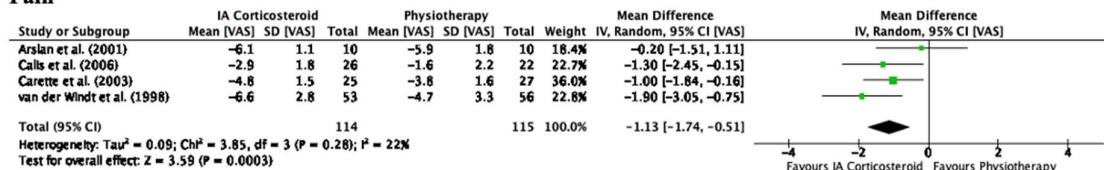

##### ER ROM

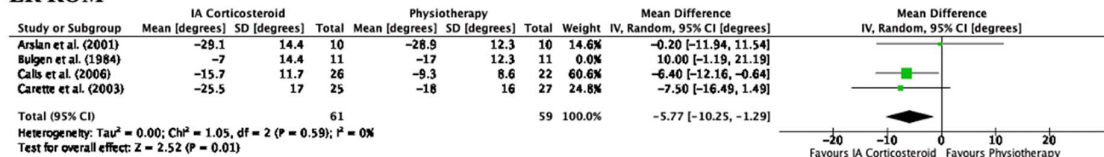

#### c) IA Corticosteroid vs SA Corticosteroid

##### Pain

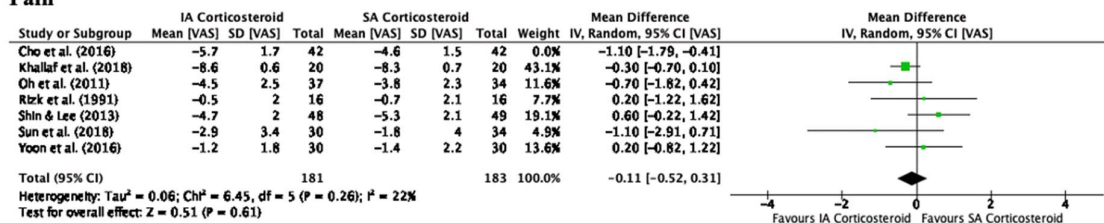

## ER ROM

| Study or Subgroup     | IA Corticosteroid |              |            | SA Corticosteroid |              |            | Total         | Weight       | Mean Difference              |  |
|-----------------------|-------------------|--------------|------------|-------------------|--------------|------------|---------------|--------------|------------------------------|--|
|                       | Mean [degrees]    | SD [degrees] | Total      | Mean [degrees]    | SD [degrees] | Total      |               |              | IV, Random, 95% CI [degrees] |  |
| Cho et al. (2016)     | -30               | 13.7         | 42         | -22.1             | 14           | 42         | 28.3%         | -7.90        | [-13.82, -1.98]              |  |
| Oh et al. (2011)      | -20               | 30.5         | 37         | -18               | 30.5         | 34         | 9.1%          | -2.00        | [-16.20, 12.20]              |  |
| Rizk et al. (1991)    | -1.3              | 23.5         | 16         | -6.6              | 21.9         | 16         | 7.7%          | 5.30         | [-10.44, 21.04]              |  |
| Shin & Lee (2013)     | -27               | 23.5         | 48         | -19               | 21.9         | 49         | 17.8%         | -8.00        | [-17.04, 1.04]               |  |
| Sun et al. (2018)     | -25.1             | 43           | 32         | 5                 | 31.1         | 32         | 0.0%          | -30.10       | [-48.49, -11.71]             |  |
| Yoon et al. (2016)    | -20               | 8            | 30         | -20               | 8            | 30         | 37.1%         | 0.00         | [-4.05, 4.05]                |  |
| <b>Total (95% CI)</b> |                   |              | <b>173</b> |                   |              | <b>171</b> | <b>100.0%</b> | <b>-3.44</b> | <b>[-8.16, 1.29]</b>         |  |

Heterogeneity:  $\tau^2 = 11.41$ ;  $\chi^2 = 6.98$ ,  $df = 4$  ( $P = 0.14$ );  $I^2 = 43\%$   
 Test for overall effect:  $Z = 1.42$  ( $P = 0.15$ )

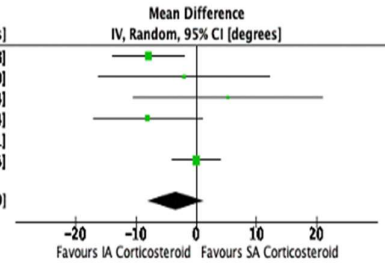

## d) IA Corticosteroid + Arthrographic Distension vs IA Corticosteroid only

### Pain

| Study or Subgroup     | Arthrographic Distension + IA Corticosteroid |          |            | IA Corticosteroid only |          |            | Total         | Weight       | Mean Difference          |  |
|-----------------------|----------------------------------------------|----------|------------|------------------------|----------|------------|---------------|--------------|--------------------------|--|
|                       | Mean [VAS]                                   | SD [VAS] | Total      | Mean [VAS]             | SD [VAS] | Total      |               |              | IV, Random, 95% CI [VAS] |  |
| Gam et al. (1998)     | -2                                           | 1.6      | 11         | -3                     | 1.6      | 11         | 0.0%          | 1.00         | [-0.34, 2.34]            |  |
| Lee et al. (2017a)    | -5                                           | 1.7      | 32         | -4.3                   | 1.6      | 32         | 14.1%         | -0.70        | [-1.51, 0.11]            |  |
| Reza et al. (2013)    | -4.7                                         | 0.7      | 50         | -3.9                   | 1.2      | 50         | 62.1%         | -0.80        | [-1.19, -0.41]           |  |
| Sharma et al. (2016)  | -4.3                                         | 2.3      | 35         | -3.9                   | 1.6      | 35         | 10.7%         | -0.40        | [-1.33, 0.53]            |  |
| Yoon et al. (2016)    | -2.4                                         | 1.5      | 30         | -1.2                   | 1.8      | 30         | 13.1%         | -1.20        | [-2.04, -0.36]           |  |
| <b>Total (95% CI)</b> |                                              |          | <b>147</b> |                        |          | <b>147</b> | <b>100.0%</b> | <b>-0.80</b> | <b>[-1.10, -0.49]</b>    |  |

Heterogeneity:  $\tau^2 = 0.00$ ;  $\chi^2 = 1.65$ ,  $df = 3$  ( $P = 0.65$ );  $I^2 = 0\%$   
 Test for overall effect:  $Z = 5.14$  ( $P < 0.00001$ )

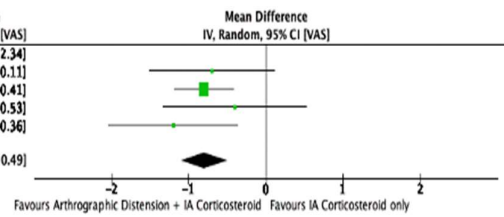

## ER ROM

| Study or Subgroup     | IA Corticosteroid+Distension |              |            | IA Corticosteroid only |              |            | Total         | Weight       | Mean Difference              |  |
|-----------------------|------------------------------|--------------|------------|------------------------|--------------|------------|---------------|--------------|------------------------------|--|
|                       | Mean [degrees]               | SD [degrees] | Total      | Mean [degrees]         | SD [degrees] | Total      |               |              | IV, Random, 95% CI [degrees] |  |
| Lee et al. (2017a)    | -18.3                        | 16           | 32         | -16.6                  | 12.4         | 32         | 16.1%         | -1.70        | [-8.71, 5.31]                |  |
| Reza et al. (2013)    | -30.4                        | 15           | 50         | -13.6                  | 11.7         | 50         | 0.0%          | -16.80       | [-22.07, -11.53]             |  |
| Sharma et al. (2016)  | -17.5                        | 16.2         | 35         | -18.6                  | 16.2         | 35         | 13.7%         | 1.10         | [-6.49, 8.69]                |  |
| Tvetza et al. (2008)  | -11                          | 14           | 39         | -10                    | 11           | 37         | 24.8%         | -1.00        | [-6.65, 4.65]                |  |
| Yoon et al. (2016)    | -22.5                        | 8.5          | 30         | -20                    | 8            | 30         | 45.4%         | -2.50        | [-6.68, 1.68]                |  |
| <b>Total (95% CI)</b> |                              |              | <b>136</b> |                        |              | <b>134</b> | <b>100.0%</b> | <b>-1.50</b> | <b>[-4.32, 1.31]</b>         |  |

Heterogeneity:  $\tau^2 = 0.00$ ;  $\chi^2 = 0.70$ ,  $df = 3$  ( $P = 0.87$ );  $I^2 = 0\%$   
 Test for overall effect:  $Z = 1.05$  ( $P = 0.29$ )

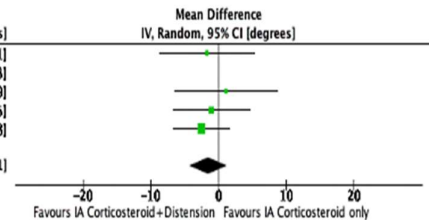

eFigure 3. Results of Pairwise Meta-analyses With Respective Mean Differences for Mid-term Outcomes

### Mid-term results (4-6 months)

#### a) IA Corticosteroid vs No Treatment/Placebo

##### Pain

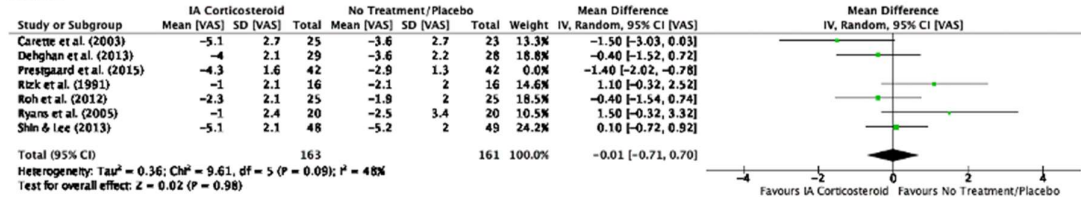

##### ER ROM

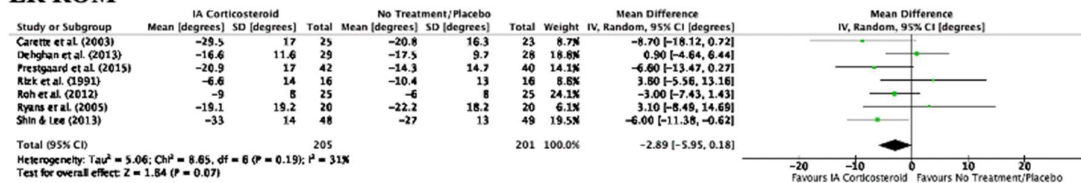

#### b) IA Corticosteroid vs Physiotherapy

##### Pain

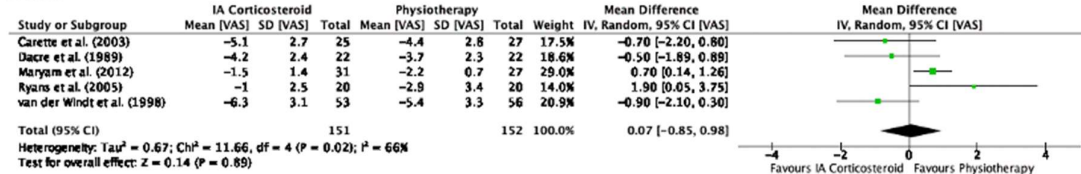

##### ER ROM

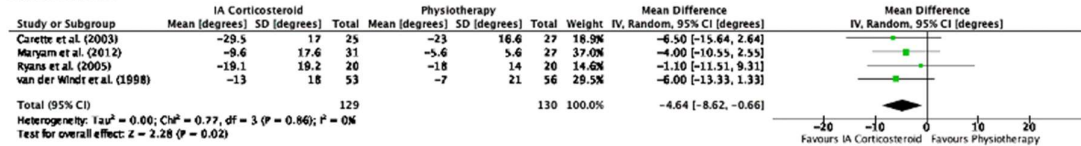

#### c) IA Corticosteroid + Physiotherapy vs IA Corticosteroid only

##### Pain

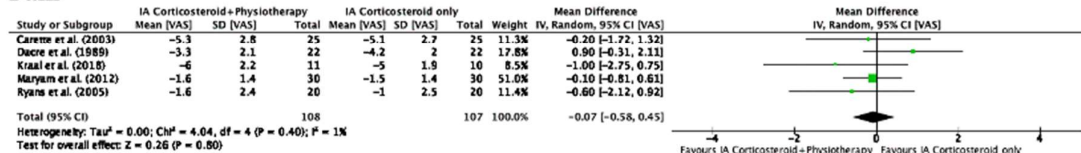

##### ER ROM

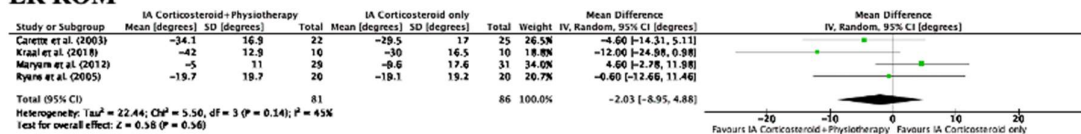

## d) IA Corticosteroid + Physiotherapy vs Physiotherapy only

### Pain

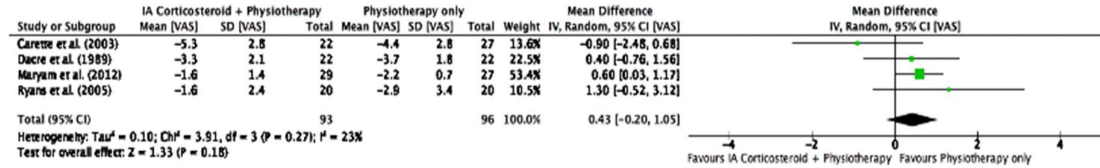

### ER ROM

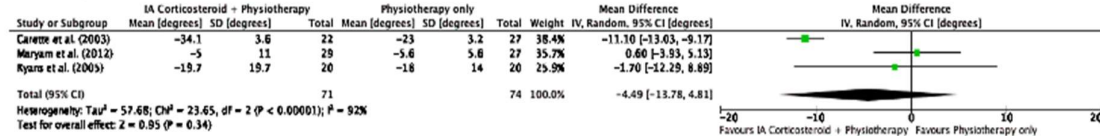

## e) IA Corticosteroid vs SA Corticosteroid

### Pain

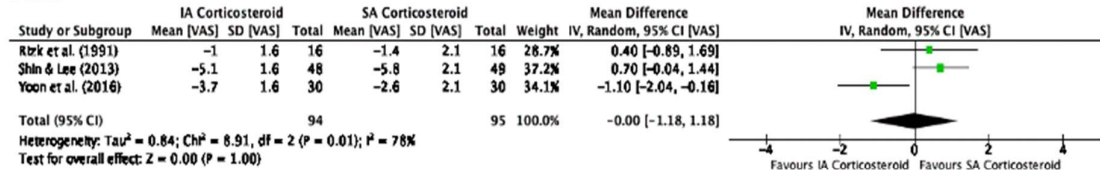

### ER ROM

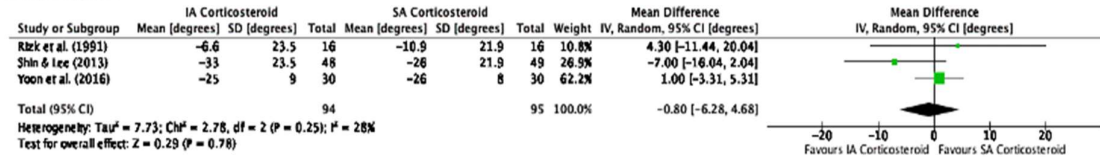



Figure 4. Results of Pairwise Meta-analyses With Respective Mean Differences for Function  
**Function Early short-term results (2-6 weeks)**

**a) IA Corticosteroid vs No Treatment/Placebo**

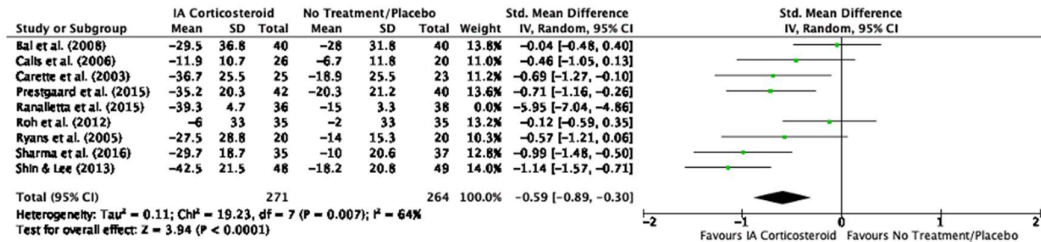

**b) IA Corticosteroid vs Physiotherapy**

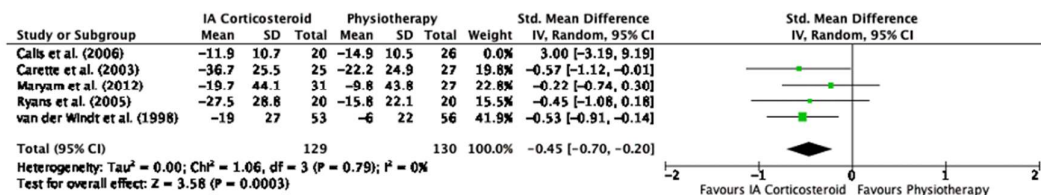

**c) IA Corticosteroid + Physiotherapy vs IA Corticosteroid only**

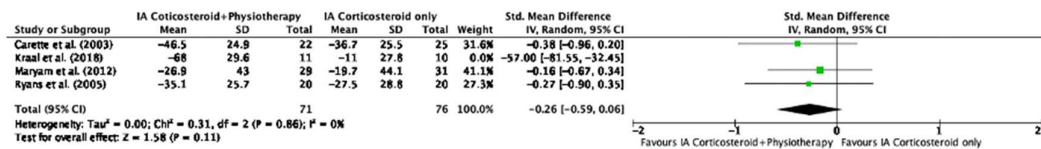

**d) IA Corticosteroid + Physiotherapy vs Physiotherapy only**

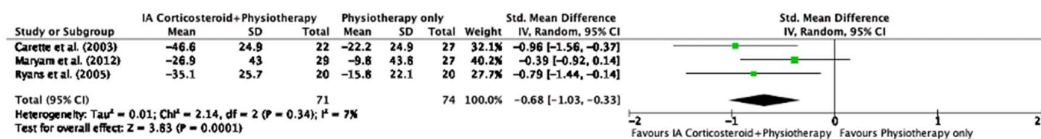

**e) IA Corticosteroid vs SA Corticosteroid**

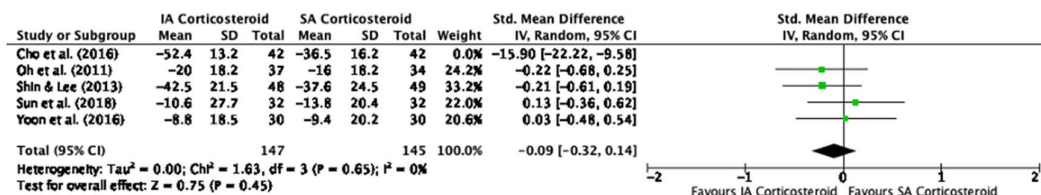

**f) IA Corticosteroid + Arthrographic Distension vs IA Corticosteroid only**

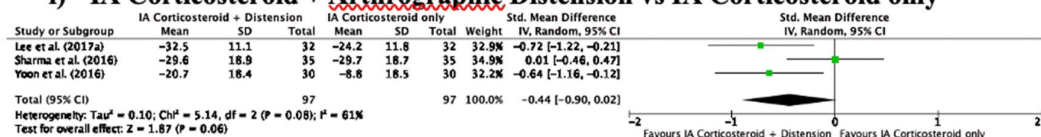

# Function Late short-term results (8-12 weeks)

## a) IA Corticosteroid vs No Treatment/Placebo

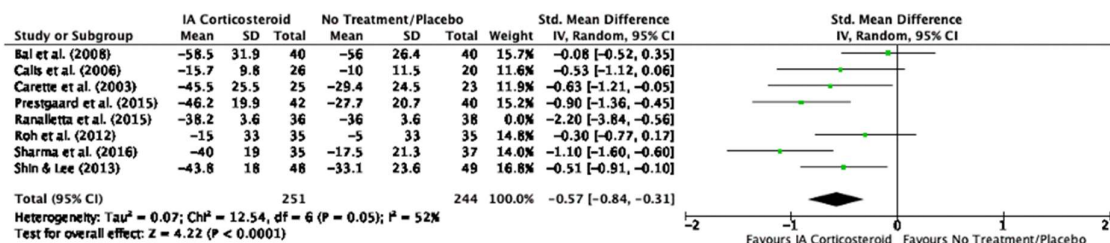

## b) IA Corticosteroid vs Physiotherapy

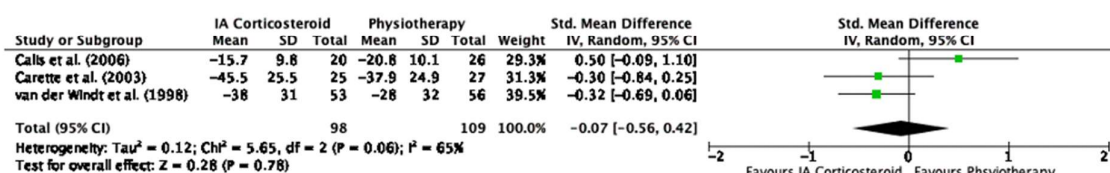

## c) IA Corticosteroid vs SA Corticosteroid

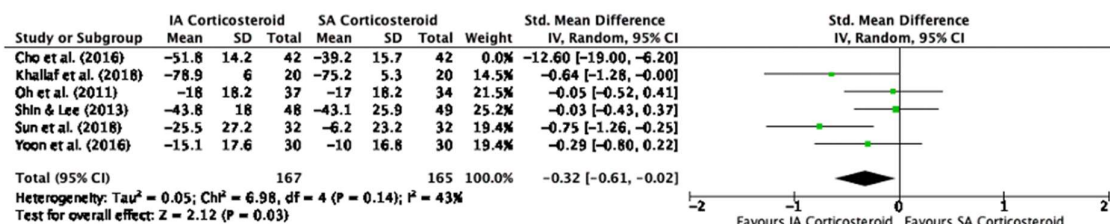

## d) IA Corticosteroid + Arthrographic Distension vs IA Corticosteroid only

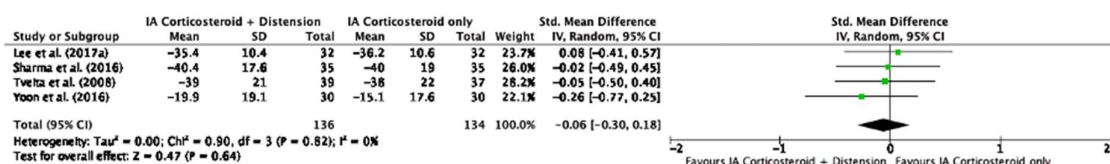

# Function mid-term results (4-6 months)

## a) IA Corticosteroid vs No Treatment/Placebo

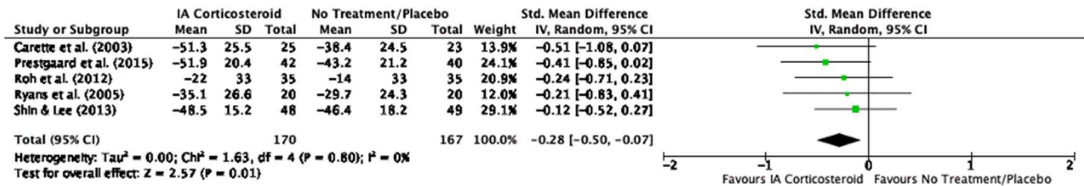

## a) IA Corticosteroid vs Physiotherapy

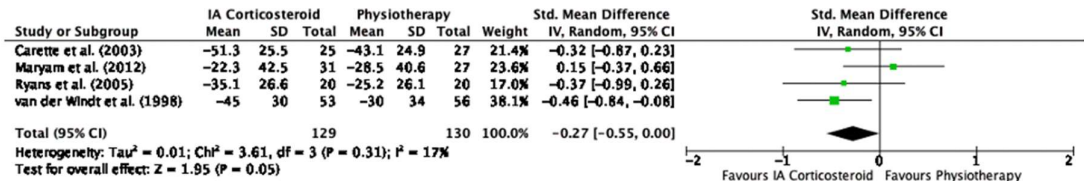

## a) IA Corticosteroid + Physiotherapy vs IA Corticosteroid only

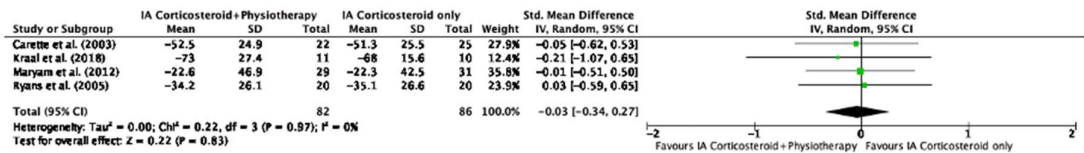

## a) IA Corticosteroid + Physiotherapy vs Physiotherapy only

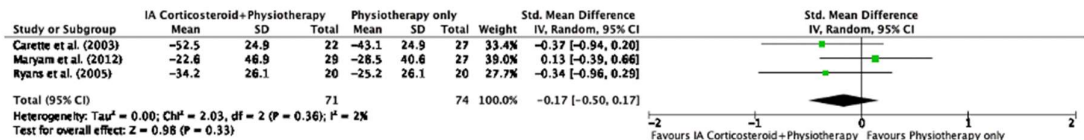



**eFigure 5. TSA Results for IA Corticosteroid vs No Treatment or Placebo for Early Short-term Pain**

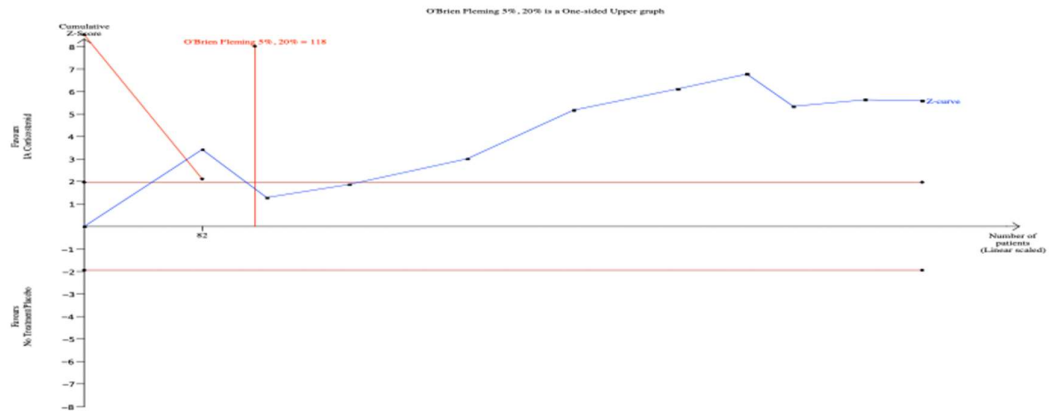

**Supplementary Figure 5 Trial sequential analysis results for intra-articular corticosteroid vs no treatment/placebo early short-term pain.** The two horizontal red lines represent the conventional thresholds for statistical significance ( $Z=1.96$ ,  $P<0.05$ ), the vertical red the required information size, the diagonal red line the TSA boundaries (thresholds for statistical significance) and the blue the cumulative amount of information as trials are added. A significant result is denoted by an inter-crossing of the blue and diagonal red lines.

**Supplementary Figure 6**

**eFigure 6. TSA Results for IA Corticosteroid vs No Treatment or Placebo for Late Short-term Pain**

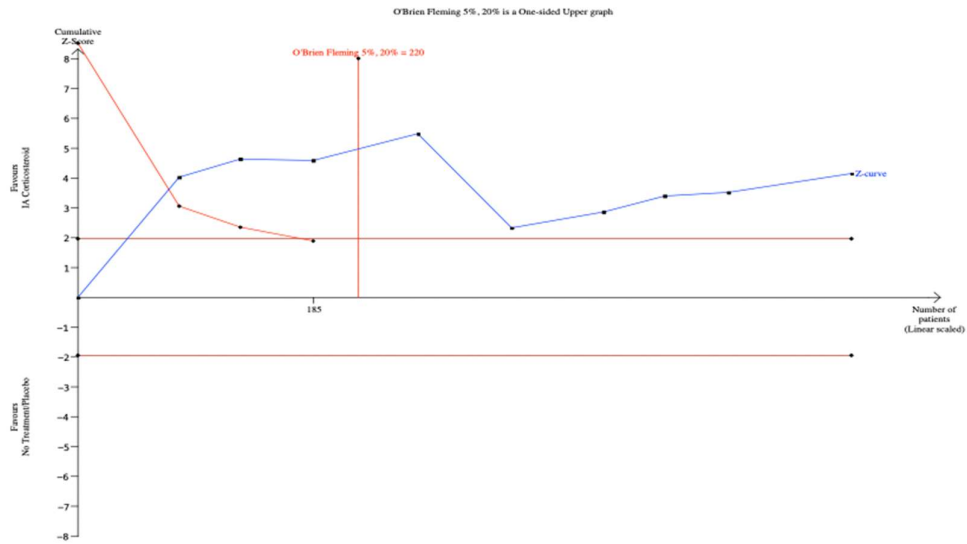

**Supplementary Figure 6b. Trial sequential analysis results for intra-articular corticosteroid vs no treatment/placebo late short-term pain.** The two horizontal red lines represent the conventional thresholds for statistical significance ( $Z=1.96$ ,  $P<0.05$ ), the vertical red line the required information size, the diagonal red line the TSA boundaries (thresholds for statistical significance) and the blue the cumulative amount of information as trials are added. A significant result is denoted by an inter-crossing of the blue and diagonal red lines.

**Figure 7. Network Forest Plots With Consistency Test for Late Short-term Pain**

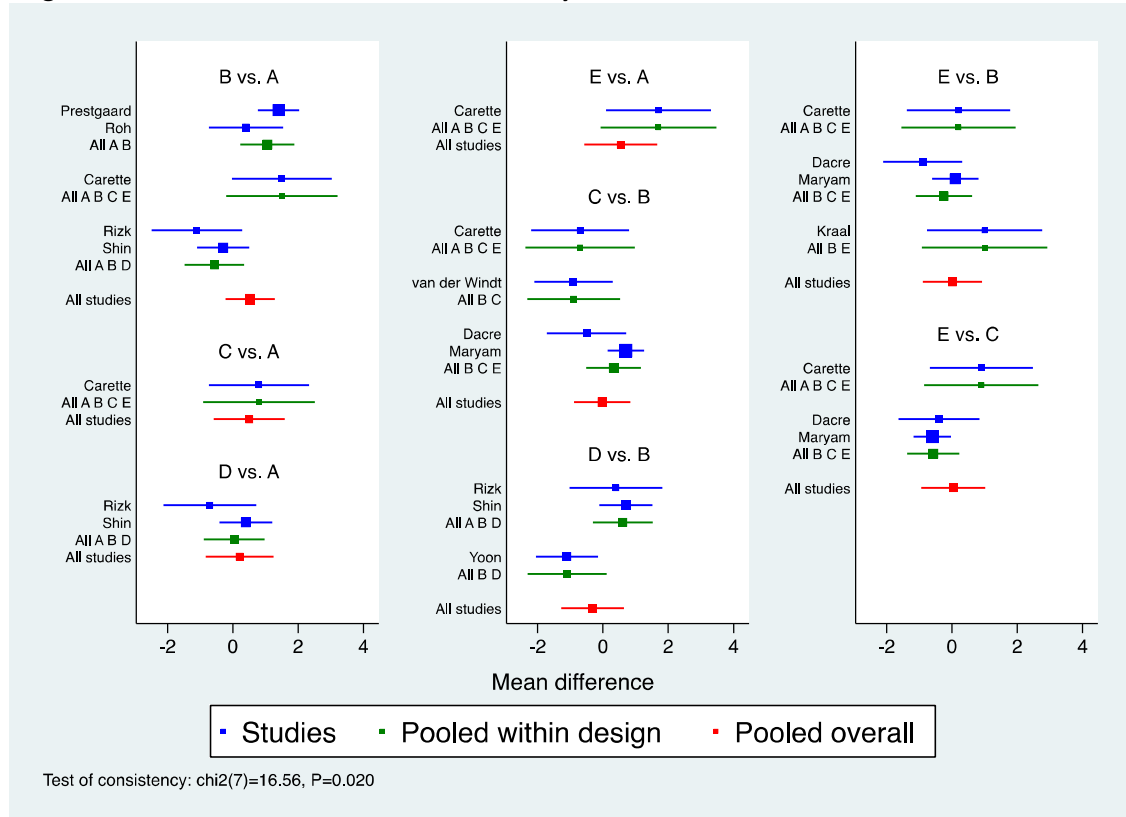

A, no treatment/placebo; B, intra-articular corticosteroid; C, physiotherapy; D, subacromial corticosteroid; E, arthrographic distension plus intra-articular corticosteroid; F, oral corticosteroid

**eFigure 8. Network Forest Plots With Consistency Test for Mid-term Pain**

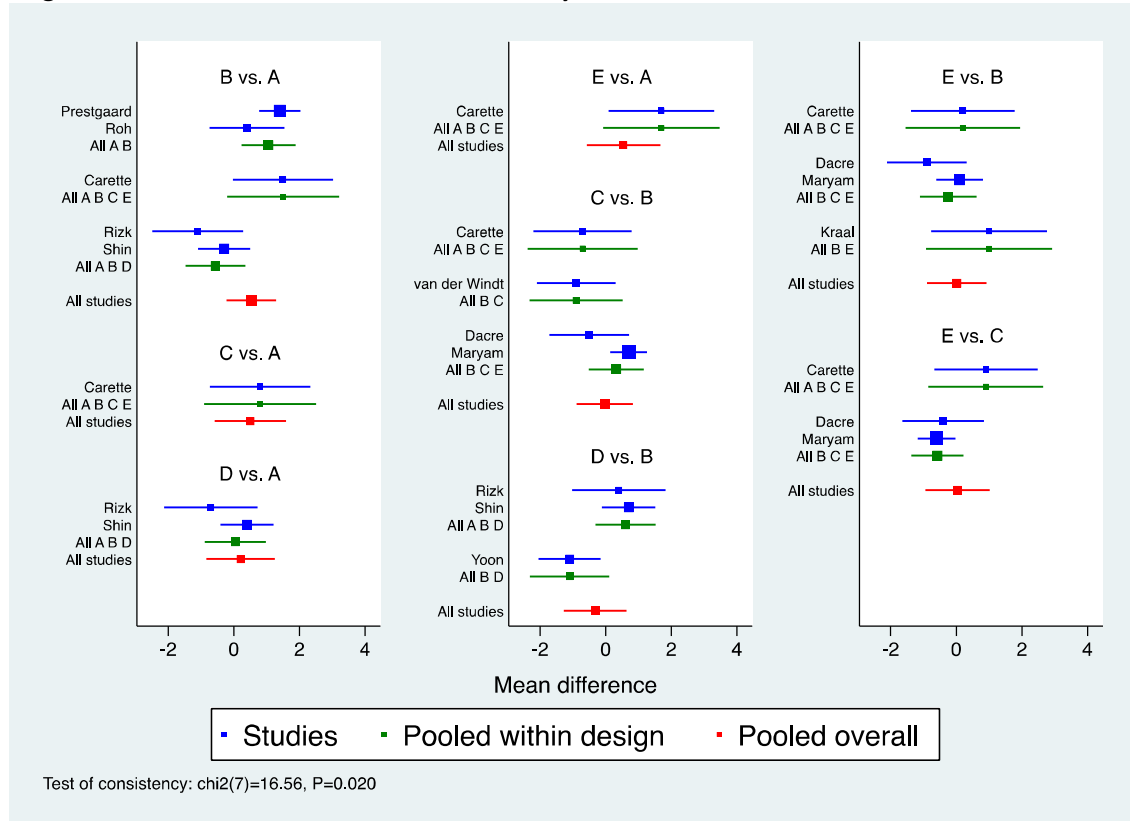

*A, no treatment/placebo; B, intra-articular corticosteroid; C, physiotherapy; D, subacromial corticosteroid; E, intra-articular corticosteroid plus physiotherapy.*
